# Supplementary material for: Tris[(1-isopropylbenzimidazol-2-yl)dimethylsilyl]methyl metal complexes, [TismPriBenz]M: a new class of metallacarbatranes, isomerization to a tris(N-heterocyclic carbene) derivative, and evidence for an inverted ligand field
Source: PubMed Central journal article supplement (PMC6100236; doi:10.1039/c7sc00499k), 2017-05-02
Supplement: SC-008-C7SC00499K-s001.pdf [file SC-008-C7SC00499K-s001.pdf]

## SUPPORTING INFORMATION

***Tris*[(1-isopropylbenzimidazol-2-yl)dimethylsilyl]methyl Metal  
Complexes, [Tism<sup>Pr<sup>i</sup>Benz</sup>]M: A New Class of Metallacarbatranes,  
Isomerization to a *Tris*(*N*-Heterocyclic Carbene) Derivative, and  
Evidence for an Inverted Ligand Field**

Serge Ruccolo, Michael Rauch and Gerard Parkin,\*

*Department of Chemistry,*

*Columbia University,*

*New York, New York 10027, USA.*

## EXPERIMENTAL SECTION

### General considerations

All manipulations were performed using a combination of glovebox, high vacuum, and Schlenk techniques under an argon atmosphere.<sup>1</sup> Solvents were purified and degassed by standard procedures. <sup>1</sup>H NMR chemical shifts are reported in ppm relative to SiMe<sub>4</sub> ( $\delta = 0$ ) and were referenced internally with respect to the protio solvent impurity ( $\delta = 7.16$  for C<sub>6</sub>D<sub>5</sub>H).<sup>2</sup> <sup>13</sup>C NMR spectra are reported in ppm relative to SiMe<sub>4</sub> ( $\delta = 0$ ) and were referenced internally with respect to the solvent ( $\delta = 128.06$  for C<sub>6</sub>D<sub>6</sub>).<sup>2</sup> <sup>7</sup>Li NMR are reported in ppm relative to LiCl ( $\delta = 0$ ) and were obtained by using the  $\mathcal{E}/100\%$  value of 38.863797.<sup>3</sup> <sup>29</sup>Si NMR chemical shifts are reported in ppm relative to SiMe<sub>4</sub> ( $\delta = 0.0$ ) and were obtained by using the  $\mathcal{E}/100\%$  value of 19.867187.<sup>3</sup> Coupling constants are given in hertz. Infrared spectra were recorded on a Perkin Elmer Spectrum Two spectrometer in attenuated total reflectance (ATR) mode and are reported in reciprocal centimeters. 1-isopropylbenzimidazole,<sup>4</sup> HC(SiMe<sub>2</sub>Cl)<sub>3</sub>,<sup>5</sup> Me<sub>2</sub>Mg,<sup>6</sup> and [Me<sub>3</sub>PCuCl]<sub>4</sub><sup>7</sup> were obtained by literature methods and Bu<sup>n</sup>Li (Aldrich), MeLi (Aldrich), Me<sub>2</sub>Zn (Aldrich), and (Ph<sub>3</sub>P)<sub>2</sub>NiBr<sub>2</sub> (Strem) were obtained commercially and used as received.

### X-ray Structure Determinations

X-ray diffraction data were collected on a Bruker Apex II diffractometer. Crystal data, data collection and refinement parameters are summarized in Table 1. The structures were solved by using direct methods and standard difference map techniques, and were refined by full-matrix least-squares procedures on  $F^2$  with SHELXTL (Version 2014/7).<sup>8</sup>

### Computational Details

Calculations were carried out using DFT as implemented in the Jaguar 8.9 (release 15) suite of *ab initio* quantum chemistry programs.<sup>9</sup> Geometry optimizations were

performed with the B3LYP density functional<sup>10</sup> using the LACVP\*\* basis sets. When required for thermodynamic comparisons, the energies of the optimized structures were re-evaluated by additional single point calculations on each optimized geometry using the cc-pVTZ(-f) correlation consistent triple (all atoms except Cu and Zn) and LACV3P\*\* (Cu and Zn) basis sets.<sup>11</sup>

### Synthesis of [Tism<sup>Pr<sup>i</sup>Benz</sup>]<sub>2</sub>Li

The volatile components of a solution of MeLi in Et<sub>2</sub>O (56.8 mmol, 35.5 mL of 1.6 M) were removed *in vacuo* and the solid obtained was dissolved in THF (*ca* 50 mL). The solution was treated slowly with distilled 1-isopropylbenzimidazole (8.81 g, 55 mmol) over a period of 10 minutes, and stirred for an additional 20 minutes. After this period, the volatile components were removed *in vacuo* to give an orange oil. Pentane (*ca* 30 mL) was added and the mixture was stirred for 10 minutes, after which period the volatile components were removed *in vacuo* to afford a light orange foam-like solid. The solid was dissolved in benzene (*ca* 30 mL) and the solution was added to a glass pressure vessel containing solid MeLi as obtained by the removal of volatile components *in vacuo* from a solution of MeLi in Et<sub>2</sub>O (18.9 mmol, 11.8 mL of 1.6 M). The resulting orange suspension was placed in an ice bath and was treated slowly with a solution of freshly distilled HC(SiMe<sub>2</sub>Cl)<sub>3</sub> (5.4 g, 18.4 mmol) in benzene (*ca* 20 mL) over a period of *ca.* 15 minutes. The mixture was allowed to warm to room temperature and stirred until gas evolution ceased (*ca* 1 hour), after which period the vessel was sealed and stirred at 100°C for 15 hours (*CARE!*). Benzene (*ca* 40 mL) was added to the resulting red mixture, and the fine precipitate was allowed to settle and the solution was decanted. This process was repeated with two portions of benzene (*ca* 40 mL) and the combined extracts were concentrated *in vacuo* to a volume of *ca* 20 mL, thereby resulting in the deposition of a solid over a period of two days. The solid was isolated by filtration, washed with Et<sub>2</sub>O (2 × *ca* 20 mL), and dried *in vacuo* to afford [Tism<sup>Pr<sup>i</sup>Benz</sup>]<sub>2</sub>Li as an off-white powder, (5.1 g, 41 % yield). Colorless crystals of

[Tism<sup>Pr<sup>i</sup>Benz</sup>]<sub>2</sub>Li suitable for X-ray diffraction were obtained by slow evaporation of a solution in benzene. <sup>1</sup>H NMR (C<sub>6</sub>D<sub>6</sub>): 0.63 [s, 18H, (C<sub>6</sub>H<sub>4</sub>N<sub>2</sub>CH(CH<sub>3</sub>)<sub>2</sub>CSi(CH<sub>3</sub>)<sub>2</sub>)<sub>3</sub>CLi], 1.23 [d, J = 7 Hz, 18H, (C<sub>6</sub>H<sub>4</sub>N<sub>2</sub>CH(CH<sub>3</sub>)<sub>2</sub>CSi(CH<sub>3</sub>)<sub>2</sub>)<sub>3</sub>CLi], 4.84 [sept, J = 7 Hz, 3H, (C<sub>6</sub>H<sub>4</sub>N<sub>2</sub>CH(CH<sub>3</sub>)<sub>2</sub>CSi(CH<sub>3</sub>)<sub>2</sub>)<sub>3</sub>CLi], 7.06 [m, 6H, (C<sub>6</sub>H<sub>4</sub>N<sub>2</sub>CH(CH<sub>3</sub>)<sub>2</sub>CSi(CH<sub>3</sub>)<sub>2</sub>)<sub>3</sub>CLi], 7.28 [m, 3H, (C<sub>6</sub>H<sub>4</sub>N<sub>2</sub>CH(CH<sub>3</sub>)<sub>2</sub>CSi(CH<sub>3</sub>)<sub>2</sub>)<sub>3</sub>CLi], 8.00 [m, 3H, (C<sub>6</sub>H<sub>4</sub>N<sub>2</sub>CH(CH<sub>3</sub>)<sub>2</sub>CSi(CH<sub>3</sub>)<sub>2</sub>)<sub>3</sub>CLi]. <sup>13</sup>C NMR (C<sub>6</sub>D<sub>6</sub>): 6.23 [s, 6C, (C<sub>6</sub>H<sub>4</sub>N<sub>2</sub>CH(CH<sub>3</sub>)<sub>2</sub>CSi(CH<sub>3</sub>)<sub>2</sub>)<sub>3</sub>CLi], 21.18 [s, 6C, (C<sub>6</sub>H<sub>4</sub>N<sub>2</sub>CH(CH<sub>3</sub>)<sub>2</sub>CSi(CH<sub>3</sub>)<sub>2</sub>)<sub>3</sub>CLi], 49.40 [s, 3C, (C<sub>6</sub>H<sub>4</sub>N<sub>2</sub>CH(CH<sub>3</sub>)<sub>2</sub>CSi(CH<sub>3</sub>)<sub>2</sub>)<sub>3</sub>CLi], 112.73 [s, 3C, (C<sub>6</sub>H<sub>4</sub>N<sub>2</sub>CH(CH<sub>3</sub>)<sub>2</sub>CSi(CH<sub>3</sub>)<sub>2</sub>)<sub>3</sub>CLi], 119.78 [s, 3C, (C<sub>6</sub>H<sub>4</sub>N<sub>2</sub>CH(CH<sub>3</sub>)<sub>2</sub>CSi(CH<sub>3</sub>)<sub>2</sub>)<sub>3</sub>CLi], 121.91 [s, 3C, (C<sub>6</sub>H<sub>4</sub>N<sub>2</sub>CH(CH<sub>3</sub>)<sub>2</sub>CSi(CH<sub>3</sub>)<sub>2</sub>)<sub>3</sub>CLi], 121.96 [s, 3C, (C<sub>6</sub>H<sub>4</sub>N<sub>2</sub>CH(CH<sub>3</sub>)<sub>2</sub>CSi(CH<sub>3</sub>)<sub>2</sub>)<sub>3</sub>CLi], 134.21 [s, 3C, (C<sub>6</sub>H<sub>4</sub>N<sub>2</sub>CH(CH<sub>3</sub>)<sub>2</sub>CSi(CH<sub>3</sub>)<sub>2</sub>)<sub>3</sub>CLi], 145.52 [s, 3C, (C<sub>6</sub>H<sub>4</sub>N<sub>2</sub>CH(CH<sub>3</sub>)<sub>2</sub>CSi(CH<sub>3</sub>)<sub>2</sub>)<sub>3</sub>CLi], 169.31 [s, 3C, (C<sub>6</sub>H<sub>4</sub>N<sub>2</sub>CH(CH<sub>3</sub>)<sub>2</sub>CSi(CH<sub>3</sub>)<sub>2</sub>)<sub>3</sub>CLi], not observed [(C<sub>6</sub>H<sub>4</sub>N<sub>2</sub>CH(CH<sub>3</sub>)<sub>2</sub>CSi(CH<sub>3</sub>)<sub>2</sub>)<sub>3</sub>CLi]. <sup>29</sup>Si NMR (C<sub>6</sub>D<sub>6</sub>): -14.48 [s, (C<sub>6</sub>H<sub>4</sub>N<sub>2</sub>CH(CH<sub>3</sub>)<sub>2</sub>CSi(CH<sub>3</sub>)<sub>2</sub>)<sub>3</sub>CLi]. <sup>7</sup>Li NMR (C<sub>6</sub>D<sub>6</sub>): 5.32. Anal. calc. for [Tism<sup>Pr<sup>i</sup>Benz</sup>]<sub>2</sub>Li: C, 66.2%; H, 7.7%; N, 12.5%. Found: C, 66.5%; H, 7.4%; N, 12.3%. IR Data (cm<sup>-1</sup>): 3053 (w), 2964 (w), 2949 (w), 1463 (m), 1389 (w), 1371 (w), 1341 (m), 1320 (w), 1282 (m), 1159 (w), 1106 (w), 1061 (m), 964 (vs), 821 (s), 791 (s), 737 (vs), 672 (s).

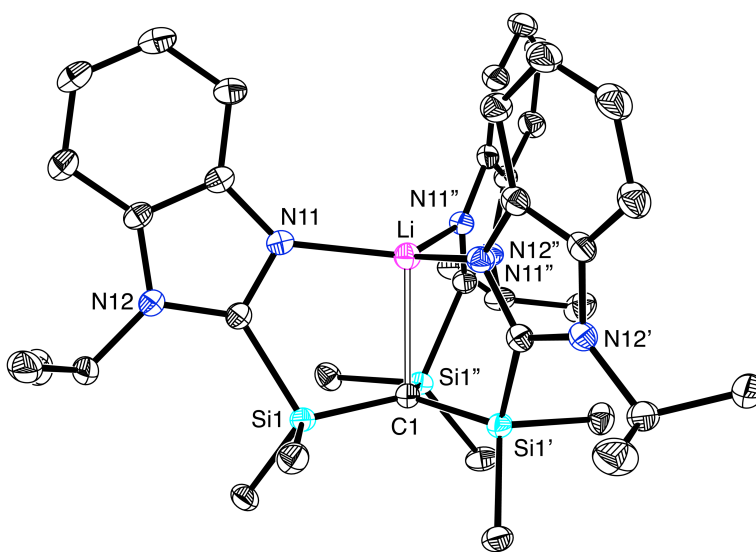

*Molecular Structure [Tism<sup>Pr<sup>i</sup>Benz</sup>]<sub>2</sub>Li*

### Synthesis of [Tism<sup>Pr<sup>i</sup>Benz</sup>]H

H<sub>2</sub>O (40  $\mu$ L, 2.22 mmol) was added to a solution of [Tism<sup>Pr<sup>i</sup>Benz</sup>]Li (640 mg, 0.954 mmol) in benzene (*ca* 25 mL). The mixture was stirred for 1 hour at room temperature, during which period a precipitate formed. The volatile components were removed *in vacuo* and the residue obtained was extracted into benzene (*ca* 25 mL). The solvent was removed from the extract *in vacuo* resulting in [Tism<sup>Pr<sup>i</sup>Benz</sup>]H as a white powder (610 mg, 96% yield). Colorless crystals of [Tism<sup>Pr<sup>i</sup>Benz</sup>]H suitable for X-ray diffraction were obtained *via* slow evaporation of a benzene solution. <sup>1</sup>H NMR (C<sub>6</sub>D<sub>6</sub>): 0.55 [s, 18H, (C<sub>6</sub>H<sub>4</sub>N<sub>2</sub>CH(CH<sub>3</sub>)<sub>2</sub>CSi(CH<sub>3</sub>)<sub>2</sub>)<sub>3</sub>CH], 1.40 [d, J = 7 Hz, 18H, (C<sub>6</sub>H<sub>4</sub>N<sub>2</sub>CH(CH<sub>3</sub>)<sub>2</sub>CSi(CH<sub>3</sub>)<sub>2</sub>)<sub>3</sub>CH], 2.30 [s, 1H, (C<sub>6</sub>H<sub>4</sub>N<sub>2</sub>CH(CH<sub>3</sub>)<sub>2</sub>CSi(CH<sub>3</sub>)<sub>2</sub>)<sub>3</sub>CH], 5.09 [sep, J = 7 Hz, 3H, (C<sub>6</sub>H<sub>4</sub>N<sub>2</sub>CH(CH<sub>3</sub>)<sub>2</sub>CSi(CH<sub>3</sub>)<sub>2</sub>)<sub>3</sub>CH], 7.14-7.23 [m, 6H, (C<sub>6</sub>H<sub>4</sub>N<sub>2</sub>CH(CH<sub>3</sub>)<sub>2</sub>CSi(CH<sub>3</sub>)<sub>2</sub>)<sub>3</sub>CH], 7.38 [d, J = 8 Hz, 3H, (C<sub>6</sub>H<sub>4</sub>N<sub>2</sub>CH(CH<sub>3</sub>)<sub>2</sub>CSi(CH<sub>3</sub>)<sub>2</sub>)<sub>3</sub>CH], 8.04 [d, J = 8 Hz, 3H, (C<sub>6</sub>H<sub>4</sub>N<sub>2</sub>CH(CH<sub>3</sub>)<sub>2</sub>CSi(CH<sub>3</sub>)<sub>2</sub>)<sub>3</sub>CH]. <sup>13</sup>C{<sup>1</sup>H} NMR (C<sub>6</sub>D<sub>6</sub>): -1.22 [s, 1C, (C<sub>6</sub>H<sub>4</sub>N<sub>2</sub>CH(CH<sub>3</sub>)<sub>2</sub>CSi(CH<sub>3</sub>)<sub>2</sub>)<sub>3</sub>CH], 1.89 [s, 6C, (C<sub>6</sub>H<sub>4</sub>N<sub>2</sub>CH(CH<sub>3</sub>)<sub>2</sub>CSi(CH<sub>3</sub>)<sub>2</sub>)<sub>3</sub>CH], 21.49 [s, 6C, (C<sub>6</sub>H<sub>4</sub>N<sub>2</sub>CH(CH<sub>3</sub>)<sub>2</sub>CSi(CH<sub>3</sub>)<sub>2</sub>)<sub>3</sub>CH], 49.85 [s, 3C, (C<sub>6</sub>H<sub>4</sub>N<sub>2</sub>CH(CH<sub>3</sub>)<sub>2</sub>CSi(CH<sub>3</sub>)<sub>2</sub>)<sub>3</sub>CH], 112.69 [s, 3C, (C<sub>6</sub>H<sub>4</sub>N<sub>2</sub>CH(CH<sub>3</sub>)<sub>2</sub>CSi(CH<sub>3</sub>)<sub>2</sub>)<sub>3</sub>CH], 121.13 [s, 3C, (C<sub>6</sub>H<sub>4</sub>N<sub>2</sub>CH(CH<sub>3</sub>)<sub>2</sub>CSi(CH<sub>3</sub>)<sub>2</sub>)<sub>3</sub>CH], 121.73 [s, 3C, (C<sub>6</sub>H<sub>4</sub>N<sub>2</sub>CH(CH<sub>3</sub>)<sub>2</sub>CSi(CH<sub>3</sub>)<sub>2</sub>)<sub>3</sub>CH], 122.49 [s, 3C, (C<sub>6</sub>H<sub>4</sub>N<sub>2</sub>CH(CH<sub>3</sub>)<sub>2</sub>CSi(CH<sub>3</sub>)<sub>2</sub>)<sub>3</sub>CH], 134.84 [s, 3C, (C<sub>6</sub>H<sub>4</sub>N<sub>2</sub>CH(CH<sub>3</sub>)<sub>2</sub>CSi(CH<sub>3</sub>)<sub>2</sub>)<sub>3</sub>CH], 146.98 [s, 3C, (C<sub>6</sub>H<sub>4</sub>N<sub>2</sub>CH(CH<sub>3</sub>)<sub>2</sub>CSi(CH<sub>3</sub>)<sub>2</sub>)<sub>3</sub>CH], 159.75 [s, 3C, (C<sub>6</sub>H<sub>4</sub>N<sub>2</sub>CH(CH<sub>3</sub>)<sub>2</sub>CSi(CH<sub>3</sub>)<sub>2</sub>)<sub>3</sub>CH]. <sup>29</sup>Si NMR (C<sub>6</sub>D<sub>6</sub>): -7.32 [s, 3Si, (C<sub>6</sub>H<sub>4</sub>N<sub>2</sub>CH(CH<sub>3</sub>)<sub>2</sub>CSi(CH<sub>3</sub>)<sub>2</sub>)<sub>3</sub>CH]. IR Data (cm<sup>-1</sup>): 2979 (w), 1459 (m), 1394 (w), 1340 (s), 1321 (m), 1266 (m), 1162 (w), 1131 (w), 1105 (w), 1060 (m), 1014 (m), 834 (s), 820 (vs), 775 (s), 740 (vs), 681 (vs).

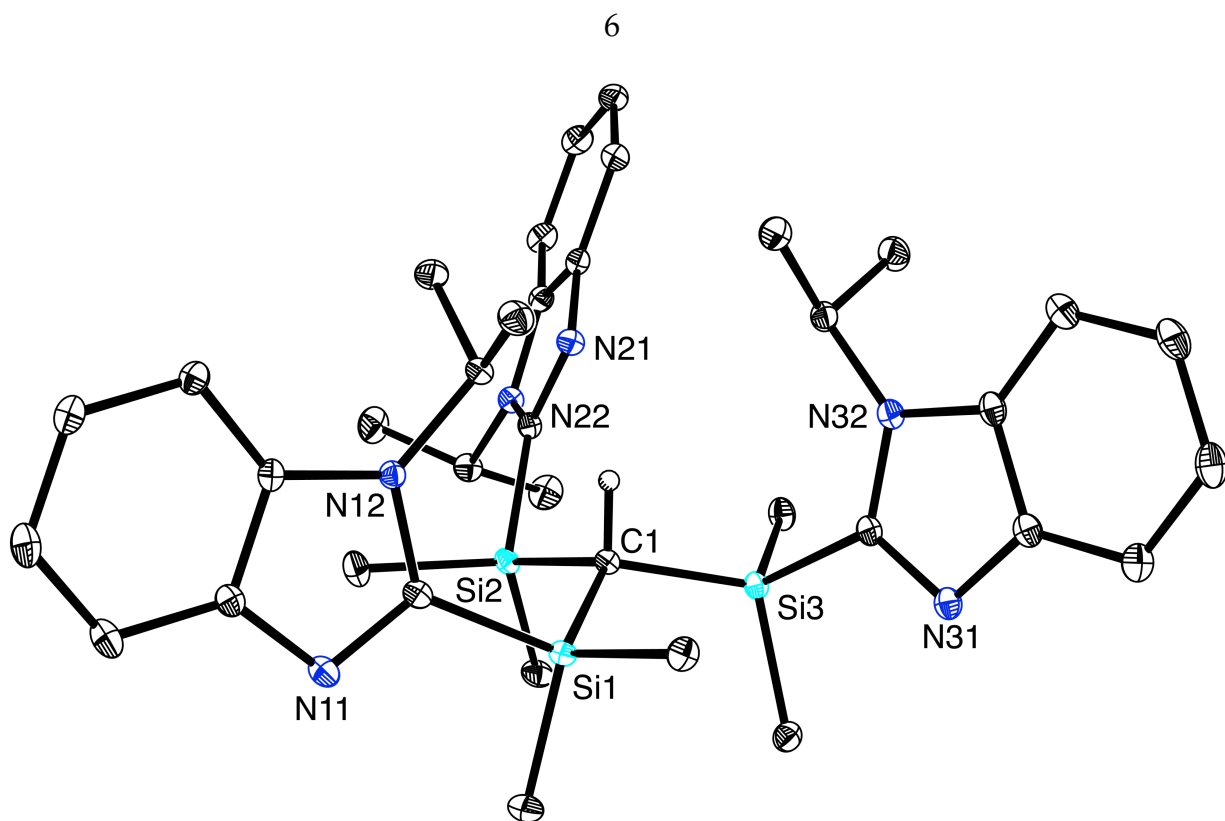

*Molecular Structure of [Tism<sup>Pr<sup>i</sup>Benz</sup>]H·1.5(C<sub>6</sub>H<sub>6</sub>) (solvent not shown for clarity)*

### Conversion of [Tism<sup>Pr<sup>i</sup>Benz</sup>]H to [Tism<sup>Pr<sup>i</sup>Benz</sup>]Li

A solution of [Tism<sup>Pr<sup>i</sup>Benz</sup>]H (30 mg, 0.045 mmol) in THF (*ca* 2 mL) was treated with Bu<sup>n</sup>Li (0.05 mL, 1.6 M in hexanes). The mixture was stirred for one hour, during which period the solution turned light orange. The volatile components were removed *in vacuo* and the formation of [Tism<sup>Pr<sup>i</sup>Benz</sup>]Li was demonstrated by <sup>1</sup>H NMR spectroscopy.

### Synthesis of [Tism<sup>Pr<sup>i</sup>Benz</sup>]MgMe

A solution of [Tism<sup>Pr<sup>i</sup>Benz</sup>]H (400 mg, 0.601 mmol) in benzene (*ca* 20 mL) was treated with Me<sub>2</sub>Mg (40 mg, 0.736 mmol). The mixture was stirred for 20 minutes, after which the mixture was filtered and the filtrate was lyophilized to afford [Tism<sup>Pr<sup>i</sup>Benz</sup>]MgMe as a white powder (405 mg, 96% yield). Colorless crystals of [Tism<sup>Pr<sup>i</sup>Benz</sup>]MgMe suitable for X-ray diffraction were obtained *via* slow evaporation of a benzene solution. <sup>1</sup>H NMR (C<sub>6</sub>D<sub>6</sub>): 0.20 [s, 3H, (C<sub>6</sub>H<sub>4</sub>N<sub>2</sub>CH(CH<sub>3</sub>)<sub>2</sub>CSi(CH<sub>3</sub>)<sub>2</sub>)<sub>3</sub>CMgCH<sub>3</sub>], 0.45 [s, 18H, (C<sub>6</sub>H<sub>4</sub>N<sub>2</sub>CH(CH<sub>3</sub>)<sub>2</sub>CSi(CH<sub>3</sub>)<sub>2</sub>)<sub>3</sub>CMgCH<sub>3</sub>], 1.16 [d, J = 7 Hz, 18H,

$(\text{C}_6\text{H}_4\text{N}_2\text{CH}(\underline{\text{C}}\text{H}_3)_2\text{CSi}(\text{CH}_3)_2)_3\text{CMgCH}_3$ , 4.66 [sep,  $J = 7$  Hz, 3H,  
 $(\text{C}_6\text{H}_4\text{N}_2\text{CH}(\underline{\text{C}}\text{H}_3)_2\text{CSi}(\text{CH}_3)_2)_3\text{CMgCH}_3$ , 7.01-7.19 [m, 9H,  
 $(\text{C}_6\text{H}_4\text{N}_2\text{CH}(\underline{\text{C}}\text{H}_3)_2\text{CSi}(\text{CH}_3)_2)_3\text{CMgCH}_3$ , 8.83 [d,  $J = 8$  Hz, 3H,  
 $(\text{C}_6\text{H}_4\text{N}_2\text{CH}(\underline{\text{C}}\text{H}_3)_2\text{CSi}(\text{CH}_3)_2)_3\text{CMgCH}_3$ .  $^{13}\text{C}\{^1\text{H}\}$  NMR ( $\text{C}_6\text{D}_6$ ): 0.57 [s, 1C,  
 $(\text{C}_6\text{H}_4\text{N}_2\text{CH}(\underline{\text{C}}\text{H}_3)_2\text{CSi}(\text{CH}_3)_2)_3\text{CMg}\underline{\text{C}}\text{H}_3$ , 4.54 [s, 6C,  
 $(\text{C}_6\text{H}_4\text{N}_2\text{CH}(\underline{\text{C}}\text{H}_3)_2\text{CSi}(\underline{\text{C}}\text{H}_3)_2)_3\text{CMgCH}_3$ , 21.01 [s, 6C,  
 $(\text{C}_6\text{H}_4\text{N}_2\text{CH}(\underline{\text{C}}\text{H}_3)_2\text{CSi}(\text{CH}_3)_2)_3\text{CMgCH}_3$ , 50.09 [s, 3C,  
 $(\text{C}_6\text{H}_4\text{N}_2\text{CH}(\underline{\text{C}}\text{H}_3)_2\text{CSi}(\text{CH}_3)_2)_3\text{CMgCH}_3$ , 112.24 [s, 3C,  
 $(\underline{\text{C}}_6\text{H}_4\text{N}_2\text{CH}(\text{CH}_3)_2\text{CSi}(\text{CH}_3)_2)_3\text{CMgCH}_3$ , 122.54 [s, 3C,  
 $(\underline{\text{C}}_6\text{H}_4\text{N}_2\text{CH}(\text{CH}_3)_2\text{CSi}(\text{CH}_3)_2)_3\text{CMgCH}_3$ , 122.69 [s, 3C,  
 $(\underline{\text{C}}_6\text{H}_4\text{N}_2\text{CH}(\text{CH}_3)_2\text{CSi}(\text{CH}_3)_2)_3\text{CMgCH}_3$ , 122.90 [s, 3C,  
 $(\underline{\text{C}}_6\text{H}_4\text{N}_2\text{CH}(\text{CH}_3)_2\text{CSi}(\text{CH}_3)_2)_3\text{CMgCH}_3$ , 134.55 [s, 3C,  
 $(\underline{\text{C}}_6\text{H}_4\text{N}_2\text{CH}(\text{CH}_3)_2\text{CSi}(\text{CH}_3)_2)_3\text{CMgCH}_3$ , 144.78 [s, 3C,  
 $(\underline{\text{C}}_6\text{H}_4\text{N}_2\text{CH}(\text{CH}_3)_2\text{CSi}(\text{CH}_3)_2)_3\text{CMgCH}_3$ , 166.94 [s, 3C,  
 $(\underline{\text{C}}_6\text{H}_4\text{N}_2\text{CH}(\text{CH}_3)_2\text{CSi}(\text{CH}_3)_2)_3\text{CMgCH}_3$ , not observed  
 $[(\text{C}_6\text{H}_4\text{N}_2\text{CH}(\text{CH}_3)_2\text{CSi}(\text{CH}_3)_2)_3\underline{\text{C}}\text{MgCH}_3]$ .  $^{29}\text{Si}$  NMR ( $\text{C}_6\text{D}_6$ ): -12.69 [s, 3Si,  
 $(\text{C}_6\text{H}_4\text{N}_2\text{CH}(\text{CH}_3)_2\text{CSi}(\text{CH}_3)_2)_3\text{CMgCH}_3$ . Anal. calc. for  $[\text{Tism}^{\text{Pri}^{\text{Benz}}}\text{MgMe}\cdot\text{C}_6\text{H}_6]: \text{C}$ ,  
67.6%; H, 7.7%; N, 10.8%. Found: C, 66.8%; H, 7.6%; N, 10.4%. IR Data (ATR,  $\text{cm}^{-1}$ ):  
2973 (m), 1462 (m), 1391 (w), 1340 (m), 1257 (m), 1060 (m), 1011 (m), 948 (s), 821 (vs), 739  
(vs), 676 (s).

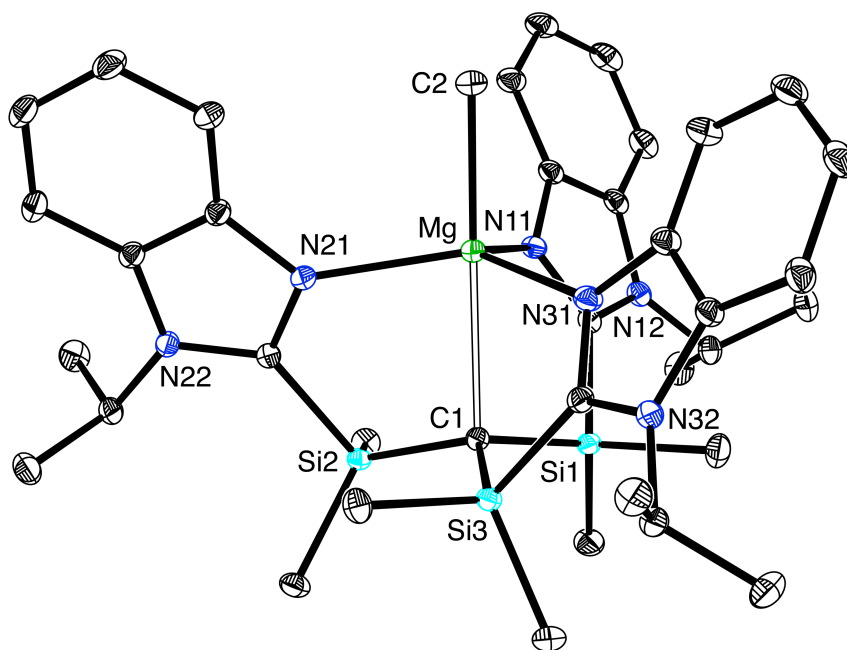

*Molecular Structure of [Tism<sup>Pr<sup>i</sup>Benz</sup>]MgMe·(C<sub>6</sub>H<sub>6</sub>) (solvent not shown for clarity)*

### Synthesis of [ $\kappa^3$ -Tism<sup>Pr<sup>i</sup>Benz</sup>]ZnMe

A solution of [Tism<sup>Pr<sup>i</sup>Benz</sup>]H (30 mg, 0.045 mmol) in benzene (*ca.* 0.7 mL) was treated with Me<sub>2</sub>Zn (15 mg, 0.157 mmol) in an NMR tube equipped with a J. Young valve and the solution was heated at 60°C for 1 day. After this period the mixture was filtered and the filtrate was lyophilized to afford [ $\kappa^3$ -Tism<sup>Pr<sup>i</sup>Benz</sup>]ZnMe as a white powder (18 mg, 54%). Colorless crystals of [ $\kappa^3$ -Tism<sup>Pr<sup>i</sup>Benz</sup>]ZnMe suitable for X-ray diffraction were obtained by vapor diffusion of pentane into a solution in benzene. <sup>1</sup>H NMR (C<sub>6</sub>D<sub>6</sub>): 0.31 [s, 3H, (C<sub>6</sub>H<sub>4</sub>N<sub>2</sub>CH(CH<sub>3</sub>)<sub>2</sub>CSi(CH<sub>3</sub>)<sub>2</sub>)<sub>3</sub>CZnCH<sub>3</sub>], 0.76 [s, 18H, (C<sub>6</sub>H<sub>4</sub>N<sub>2</sub>CH(CH<sub>3</sub>)<sub>2</sub>CSi(CH<sub>3</sub>)<sub>2</sub>)<sub>3</sub>CZnCH<sub>3</sub>], 1.14 [d, J = 6.9 Hz, 18H, (C<sub>6</sub>H<sub>4</sub>N<sub>2</sub>CH(CH<sub>3</sub>)<sub>2</sub>CSi(CH<sub>3</sub>)<sub>2</sub>)<sub>3</sub>CZnCH<sub>3</sub>], 4.70 [sept, J = 7 Hz, 3H (C<sub>6</sub>H<sub>4</sub>N<sub>2</sub>CH(CH<sub>3</sub>)<sub>2</sub>CSi(CH<sub>3</sub>)<sub>2</sub>)<sub>3</sub>CZnCH<sub>3</sub>], 7.05 [m, 3H, (C<sub>6</sub>H<sub>4</sub>N<sub>2</sub>CH(CH<sub>3</sub>)<sub>2</sub>CSi(CH<sub>3</sub>)<sub>2</sub>)<sub>3</sub>CZnCH<sub>3</sub>], 7.23 [d, J = 8.2 Hz, (C<sub>6</sub>H<sub>4</sub>N<sub>2</sub>CH(CH<sub>3</sub>)<sub>2</sub>CSi(CH<sub>3</sub>)<sub>2</sub>)<sub>3</sub>CZnCH<sub>3</sub>], 8.22 [d, J = 8 Hz, (C<sub>6</sub>H<sub>4</sub>N<sub>2</sub>CH(CH<sub>3</sub>)<sub>2</sub>CSi(CH<sub>3</sub>)<sub>2</sub>)<sub>3</sub>CZnCH<sub>3</sub>]. <sup>13</sup>C NMR (C<sub>6</sub>D<sub>6</sub>): -10.51 [s, 1C, (C<sub>6</sub>H<sub>4</sub>N<sub>2</sub>CH(CH<sub>3</sub>)<sub>2</sub>CSi(CH<sub>3</sub>)<sub>2</sub>)<sub>3</sub>CZnCH<sub>3</sub>], 4.98 [s, 6C,



$(\text{C}_6\text{H}_4\text{N}_2\text{CH}(\text{CH}_3)_2\text{CSi}(\text{CH}_3)_2)_3\text{CZnCH}_3$ , 21.15 [s, 6C,  
 $(\text{C}_6\text{H}_4\text{N}_2\text{CH}(\text{CH}_3)_2\text{CSi}(\text{CH}_3)_2)_3\text{CZnCH}_3$ , 49.97 [s, 3C,  
 $(\text{C}_6\text{H}_4\text{N}_2\text{CH}(\text{CH}_3)_2\text{CSi}(\text{CH}_3)_2)_3\text{CZnCH}_3$ , 112.92 [s, 3C,  
 $(\text{C}_6\text{H}_4\text{N}_2\text{CH}(\text{CH}_3)_2\text{CSi}(\text{CH}_3)_2)_3\text{CZnCH}_3$ , 119.85 [s, 3C,  
 $(\text{C}_6\text{H}_4\text{N}_2\text{CH}(\text{CH}_3)_2\text{CSi}(\text{CH}_3)_2)_3\text{CZnCH}_3$ , 122.38 [s, 3C,  
 $(\text{C}_6\text{H}_4\text{N}_2\text{CH}(\text{CH}_3)_2\text{CSi}(\text{CH}_3)_2)_3\text{CZnCH}_3$ , 122.50 [s, 3C,  
 $(\text{C}_6\text{H}_4\text{N}_2\text{CH}(\text{CH}_3)_2\text{CSi}(\text{CH}_3)_2)_3\text{CZnCH}_3$ , 134.68 [s, 3C,  
 $(\text{C}_6\text{H}_4\text{N}_2\text{CH}(\text{CH}_3)_2\text{CSi}(\text{CH}_3)_2)_3\text{CZnCH}_3$ , 144.59 [s, 3C,  
 $(\text{C}_6\text{H}_4\text{N}_2\text{CH}(\text{CH}_3)_2\text{CSi}(\text{CH}_3)_2)_3\text{CZnCH}_3$ , 166.41 [s, 3C,  
 $(\text{C}_6\text{H}_4\text{N}_2\text{CH}(\text{CH}_3)_2\text{CSi}(\text{CH}_3)_2)_3\text{CZnCH}_3$ , not observed  
 $[(\text{C}_6\text{H}_4\text{N}_2\text{CH}(\text{CH}_3)_2\text{CSi}(\text{CH}_3)_2)_3\text{CZnCH}_3]$ .  $^{29}\text{Si}$  NMR ( $\text{C}_6\text{D}_6$ ): -7.97 [s,  
 $(\text{C}_6\text{H}_4\text{N}_2\text{CH}(\text{CH}_3)_2\text{CSi}(\text{CH}_3)_2)_3\text{CZnCH}_3$ . Anal. calc. for  $[\kappa^3\text{-Tism}^{\text{Pri}^i\text{Benz}}]\text{ZnMe}$ : C, 61.3%; H,  
7.3%; N, 11.3%. Found: C, 61.7%; H, 6.7%; N, 10.2%. IR Data ( $\text{cm}^{-1}$ ): 2969 (w), 2896 (w),  
1464 (m), 1390 (m), 1371 (m), 1354 (m), 1290 (w), 1252 (m), 1132 (w), 1066 (m), 919 (s),  
890 (s), 813 (s), 739 (vs), 698 (m), 645 (m).

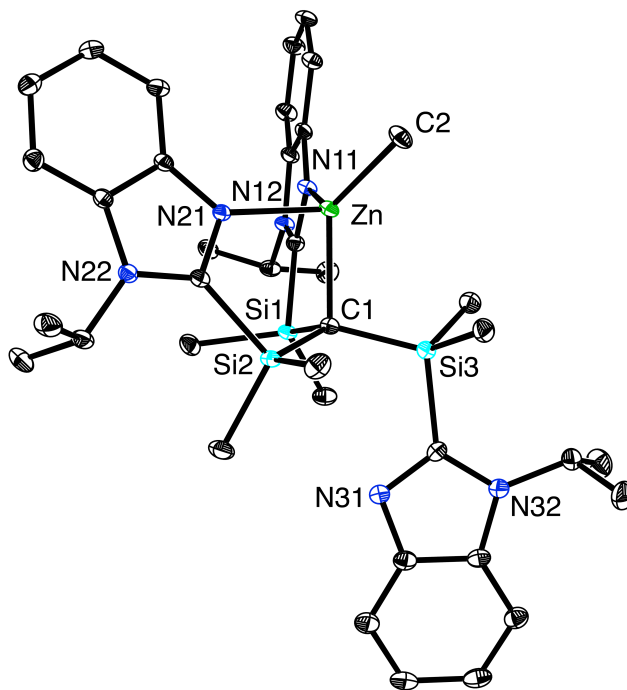

*Molecular Structure of  $[\kappa^3\text{-Tism}^{\text{Pri}^i\text{Benz}}]\text{ZnMe} \cdot (\text{C}_6\text{H}_6)$  (solvent not shown for clarity)*

### Synthesis of [Tism<sup>Pr<sup>i</sup>Benz</sup>]Cu

A solution of [(Me<sub>3</sub>P)CuCl]<sub>4</sub> (16 mg, 0.023 mmol) in benzene (*ca.* 1.5 mL) was treated with [Tism<sup>Pr<sup>i</sup>Benz</sup>]Li (50 mg, 0.075 mmol), thereby resulting in the formation of a yellow suspension. The suspension was stirred for one day, after which period, the solvent was removed *in vacuo*. The solid was washed with benzene (2 × 0.5 mL), resulting in [Tism<sup>Pr<sup>i</sup>Benz</sup>]Cu as a yellow solid (16 mg, 30 %). Yellow crystals suitable for X-ray diffraction were obtained by vapor diffusion of pentane into a solution in benzene. <sup>1</sup>H NMR (C<sub>6</sub>D<sub>6</sub>) 0.58 [s, 18H, (C<sub>6</sub>H<sub>4</sub>N<sub>2</sub>CH(CH<sub>3</sub>)<sub>2</sub>CSi(CH<sub>3</sub>)<sub>2</sub>)<sub>3</sub>CCu], 1.23 [d, J = 7 Hz, 18H, (C<sub>6</sub>H<sub>4</sub>N<sub>2</sub>CH(CH<sub>3</sub>)<sub>2</sub>CSi(CH<sub>3</sub>)<sub>2</sub>)<sub>3</sub>CCu], 4.77 [sept, J = 7 Hz, 3H, (C<sub>6</sub>H<sub>4</sub>N<sub>2</sub>CH(CH<sub>3</sub>)<sub>2</sub>CSi(CH<sub>3</sub>)<sub>2</sub>)<sub>3</sub>CCu], 7.02 [m, 3H, (C<sub>6</sub>H<sub>4</sub>N<sub>2</sub>CH(CH<sub>3</sub>)<sub>2</sub>CSi(CH<sub>3</sub>)<sub>2</sub>)<sub>3</sub>CCu], 7.11 [m, 3H, (C<sub>6</sub>H<sub>4</sub>N<sub>2</sub>CH(CH<sub>3</sub>)<sub>2</sub>CSi(CH<sub>3</sub>)<sub>2</sub>)<sub>3</sub>CCu], 7.26 [d, J = 8.1 Hz, 3H, (C<sub>6</sub>H<sub>4</sub>N<sub>2</sub>CH(CH<sub>3</sub>)<sub>2</sub>CSi(CH<sub>3</sub>)<sub>2</sub>)<sub>3</sub>CCu], 8.29 [d, J = 8 Hz, 3H, (C<sub>6</sub>H<sub>4</sub>N<sub>2</sub>CH(CH<sub>3</sub>)<sub>2</sub>CSi(CH<sub>3</sub>)<sub>2</sub>)<sub>3</sub>CCu]. <sup>13</sup>C NMR (C<sub>6</sub>D<sub>6</sub>): 5.65 (6C, (C<sub>6</sub>H<sub>4</sub>N<sub>2</sub>CH(CH<sub>3</sub>)<sub>2</sub>CSi(CH<sub>3</sub>)<sub>2</sub>)<sub>3</sub>CCu), 21.24 [6C, (C<sub>6</sub>H<sub>4</sub>N<sub>2</sub>CH(CH<sub>3</sub>)<sub>2</sub>CSi(CH<sub>3</sub>)<sub>2</sub>)<sub>3</sub>CCu], 49.64 [3C, (C<sub>6</sub>H<sub>4</sub>N<sub>2</sub>CH(CH<sub>3</sub>)<sub>2</sub>CSi(CH<sub>3</sub>)<sub>2</sub>)<sub>3</sub>CCu], 112.64 [3C, (C<sub>6</sub>H<sub>4</sub>N<sub>2</sub>CH(CH<sub>3</sub>)<sub>2</sub>CSi(CH<sub>3</sub>)<sub>2</sub>)<sub>3</sub>CCu], 120.21 [3C, (C<sub>6</sub>H<sub>4</sub>N<sub>2</sub>CH(CH<sub>3</sub>)<sub>2</sub>CSi(CH<sub>3</sub>)<sub>2</sub>)<sub>3</sub>CCu], 121.91 [3C, (C<sub>6</sub>H<sub>4</sub>N<sub>2</sub>CH(CH<sub>3</sub>)<sub>2</sub>CSi(CH<sub>3</sub>)<sub>2</sub>)<sub>3</sub>CCu], 122.02 [3C, (C<sub>6</sub>H<sub>4</sub>N<sub>2</sub>CH(CH<sub>3</sub>)<sub>2</sub>CSi(CH<sub>3</sub>)<sub>2</sub>)<sub>3</sub>CCu], 134.13 [3C, (C<sub>6</sub>H<sub>4</sub>N<sub>2</sub>CH(CH<sub>3</sub>)<sub>2</sub>CSi(CH<sub>3</sub>)<sub>2</sub>)<sub>3</sub>CCu], 144.34 [3C, (C<sub>6</sub>H<sub>4</sub>N<sub>2</sub>CH(CH<sub>3</sub>)<sub>2</sub>CSi(CH<sub>3</sub>)<sub>2</sub>)<sub>3</sub>CCu], 168.12 [3C, (C<sub>6</sub>H<sub>4</sub>N<sub>2</sub>CH(CH<sub>3</sub>)<sub>2</sub>CSi(CH<sub>3</sub>)<sub>2</sub>)<sub>3</sub>CCu], not observed [(C<sub>6</sub>H<sub>4</sub>N<sub>2</sub>CH(CH<sub>3</sub>)<sub>2</sub>CSi(CH<sub>3</sub>)<sub>2</sub>)<sub>3</sub>CCu]. <sup>29</sup>Si NMR (C<sub>6</sub>D<sub>6</sub>): -14.90 [s, 3Si, (C<sub>6</sub>H<sub>4</sub>N<sub>2</sub>CH(CH<sub>3</sub>)<sub>2</sub>CSi(CH<sub>3</sub>)<sub>2</sub>)<sub>3</sub>CCu]. Anal. calc. for [Tism<sup>Pr<sup>i</sup>Benz</sup>]Cu: C, 61.1%; H, 7.1%; N, 11.6%. Found: C, 60.8%; H, 7.0%; N, 11.4%. IR Data (cm<sup>-1</sup>): 3053 (w), 2963 (w), 1463 (m), 1389 (w), 1372 (w), 1344 (m), 1321 (w), 1286 (w), 1249 (m), 1159 (w), 1133 (w), 1105 (m), 954 (vs), 822 (s), 791 (s), 738 (vs), 669 (m).

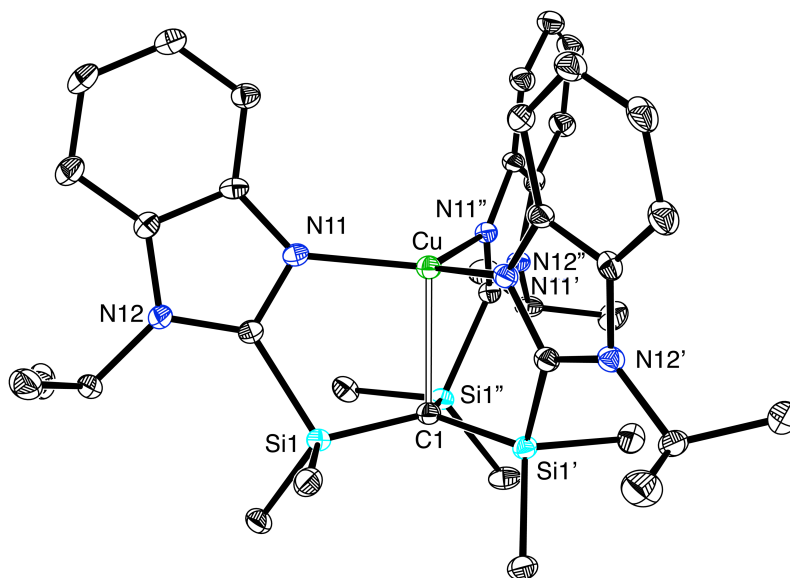

Molecular Structure of  $[\text{Tism}^{\text{Pr}^i\text{Benz}}]\text{Cu}$

### Synthesis of $[\kappa^4\text{-C}_4\text{-Tism}^{\text{Pr}^i\text{Benz}^*}]\text{Cu}$

(i) A solution of  $[\text{Tism}^{\text{Pr}^i\text{Benz}}]\text{Li}$  (20 mg, 0.03 mmol) in benzene (*ca.* 0.4 mL) in an NMR tube equipped with a J. Young valve was treated with  $[(\text{Me}_3\text{P})\text{CuCl}]_4$  (8.5 mg, 0.012 mmol). The solution was heated at 100°C for 3 hours. Upon cooling, large crystals of  $[\kappa^4\text{-C}_4\text{-Tism}^{\text{Pr}^i\text{Benz}^*}]\text{Cu}$  suitable for X-ray diffraction were deposited and isolated. Slow evaporation of the mother liquor deposited additional crystals of  $[\kappa^4\text{-C}_4\text{-Tism}^{\text{Pr}^i\text{Benz}^*}]\text{Cu}$  which were collected, washed with pentane and dried *in vacuo* (16 mg, 73%).  $^1\text{H}$  NMR ( $\text{C}_6\text{D}_6$ ): 0.61 [s, 18H,  $(\text{C}_6\text{H}_4\text{CNCH}(\text{CH}_3)_2\text{NSi}(\text{CH}_3)_2)_3\text{CCu}$ ], 1.46 [d,  $J = 7$  Hz, 18H,  $(\text{C}_6\text{H}_4\text{CNCH}(\text{CH}_3)_2\text{NSi}(\text{CH}_3)_2)_3\text{CCu}$ ], 5.34 [sept,  $J = 7$  Hz, 3H,  $(\text{C}_6\text{H}_4\text{CNCH}(\text{CH}_3)_2\text{NSi}(\text{CH}_3)_2)_3\text{CCu}$ ], 7.01 [m, 6H,  $(\text{C}_6\text{H}_4\text{CNCH}(\text{CH}_3)_2\text{NSi}(\text{CH}_3)_2)_3\text{CCu}$ ], 7.20 [m, 3H,  $(\text{C}_6\text{H}_4\text{CNCH}(\text{CH}_3)_2\text{NSi}(\text{CH}_3)_2)_3\text{CCu}$ ], 7.56 [m, 3H,  $(\text{C}_6\text{H}_4\text{CNCH}(\text{CH}_3)_2\text{NSi}(\text{CH}_3)_2)_3\text{CCu}$ ].  $^{13}\text{C}$  NMR ( $\text{C}_6\text{D}_6$ ): 5.72 [s, 6C,  $(\text{C}_6\text{H}_4\text{CNCH}(\text{CH}_3)_2\text{NSi}(\text{CH}_3)_2)_3\text{CCu}$ ], 21.56 [s, 6C, 7.20 [m, 6H,  $(\text{C}_6\text{H}_4\text{CNCH}(\text{CH}_3)_2\text{NSi}(\text{CH}_3)_2)_3\text{CCu}$ ], 53.31 [s, 3C,  $(\text{C}_6\text{H}_4\text{CNCH}(\text{CH}_3)_2\text{NSi}(\text{CH}_3)_2)_3\text{CCu}$ ], 111.08 [s, 3C,  $(\text{C}_6\text{H}_4\text{CNCH}(\text{CH}_3)_2\text{NSi}(\text{CH}_3)_2)_3\text{CCu}$ ], 113.57 [s, 3C,  $(\text{C}_6\text{H}_4\text{CNCH}(\text{CH}_3)_2\text{NSi}(\text{CH}_3)_2)_3\text{CCu}$ ], 120.80 [s, 3C,  $(\text{C}_6\text{H}_4\text{CNCH}(\text{CH}_3)_2\text{NSi}(\text{CH}_3)_2)_3\text{CCu}$ ],

121.85 [s, 3C, (C<sub>6</sub>H<sub>4</sub>CNCH(CH<sub>3</sub>)<sub>2</sub>NSi(CH<sub>3</sub>)<sub>2</sub>)<sub>3</sub>CCu], 134.95 [s, 3C, (C<sub>6</sub>H<sub>4</sub>CNCH(CH<sub>3</sub>)<sub>2</sub>NSi(CH<sub>3</sub>)<sub>2</sub>)<sub>3</sub>CCu], 139.50 [s, 3C, (C<sub>6</sub>H<sub>4</sub>CNCH(CH<sub>3</sub>)<sub>2</sub>NSi(CH<sub>3</sub>)<sub>2</sub>)<sub>3</sub>CCu], 207.73 [s, 3C, (C<sub>6</sub>H<sub>4</sub>CNCH(CH<sub>3</sub>)<sub>2</sub>NSi(CH<sub>3</sub>)<sub>2</sub>)<sub>3</sub>CCu], not observed [(C<sub>6</sub>H<sub>4</sub>CNCH(CH<sub>3</sub>)<sub>2</sub>NSi(CH<sub>3</sub>)<sub>2</sub>)<sub>3</sub>CCu]. <sup>29</sup>Si NMR (C<sub>6</sub>D<sub>6</sub>): 4.57 [s, (C<sub>6</sub>H<sub>4</sub>CNCH(CH<sub>3</sub>)<sub>2</sub>NSi(CH<sub>3</sub>)<sub>2</sub>)<sub>3</sub>CCu]. Anal. calc. for [κ<sup>4</sup>-C<sub>4</sub>-Tism<sup>Pr<sup>i</sup>Benz\*</sup>]Cu•0.33(C<sub>6</sub>H<sub>6</sub>): C, 63.2%; H, 7.1%; N, 10.8%. Found: C, 62.2%; H, 6.9%; N, 10.7%. IR Data (cm<sup>-1</sup>): 2973 (w), 1470 (m), 1388 (w), 1350 (m), 1282 (vs), 1251 (m), 1219 (m), 1166 (w), 1067 (m), 970 (vs), 811 (m), 793 (m), 768 (m), 741 (vs), 681 (m).

(ii) A solution of [Tism<sup>Pr<sup>i</sup>Benz</sup>]Cu (2 mg) in C<sub>6</sub>D<sub>6</sub> (ca. 0.5 mL) in an NMR tube equipped with a J. Young valve, containing mesitylene as an internal standard, was heated at 100°C for 30 minutes. The sample was monitored by <sup>1</sup>H NMR spectroscopy, thereby demonstrating conversion to [κ<sup>4</sup>-C<sub>4</sub>-Tism<sup>Pr<sup>i</sup>Benz\*</sup>]Cu in 80% yield.

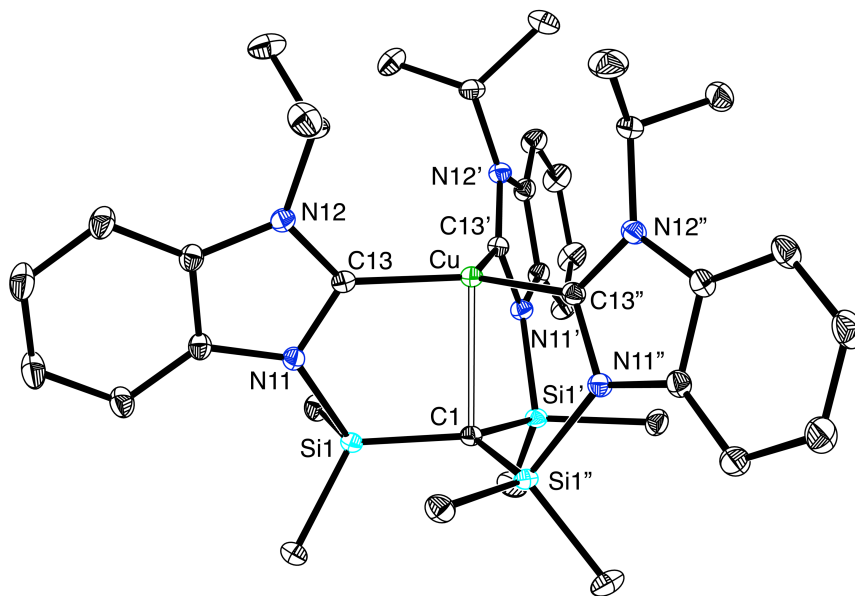

*Molecular Structure of [κ<sup>4</sup>-C<sub>4</sub>-Tism<sup>Pr<sup>i</sup>Benz\*</sup>]Cu•0.5(C<sub>6</sub>H<sub>6</sub>) (solvent not shown for clarity)*

### Synthesis of $[\text{Tism}^{\text{Pr}^i\text{Benz}}]\text{NiBr}$

A mixture of  $[\text{Tism}^{\text{Pr}^i\text{Benz}}]\text{Li}$  (50 mg, 0.075 mmol) and  $(\text{Ph}_3\text{P})_2\text{NiBr}_2$  (55 mg, 0.074 mmol) was dissolved in THF (*ca.* 2 mL) and the green solution obtained was allowed to stand over a period of 2 days, during which period green crystals of  $[\text{Tism}^{\text{Pr}^i\text{Benz}}]\text{NiBr}$  suitable for X-ray diffraction were deposited. The crystals were isolated by decanting the mother liquor, washed sequentially with THF (*ca.* 1 mL) and pentane (*ca.* 1 mL), and dried *in vacuo* to afford  $[\text{Tism}^{\text{Pr}^i\text{Benz}}]\text{NiBr}$  (37 mg, 61%).  $^1\text{H NMR}$  ( $\text{C}_6\text{D}_6$ ): 1.53 [bs], 4.85 [bs], 5.59 [bs], 8.09 [bs], 10.21 [bs], 22.52 [bs], 29.88 [bs]. Anal. calc. for  $[\text{Tism}^{\text{Pr}^i\text{Benz}}]\text{NiBr}$ : C, 55.4%; H, 6.4%; N, 10.5%. Found: C, 54.1%; H, 6.6%; N, 9.1%. IR Data ( $\text{cm}^{-1}$ ): 2972 (w), 2943 (w), 2877 (w), 1466 (m) 1392 (m), 1363 (m), 1252 (m), 1158 (w), 1133 (w), 1068 (m), 933 (s), 896 (s), 829 (s), 815 (s), 766 (m), 737 (vs), 695 (m).

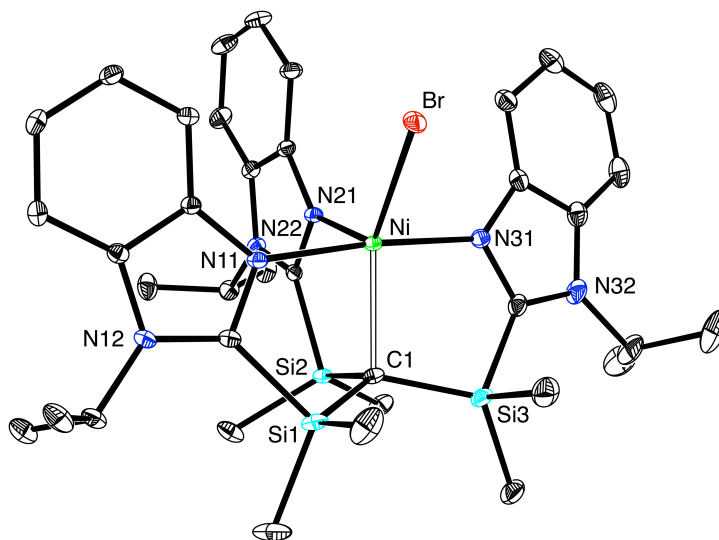

*Molecular structure of  $[\text{Tism}^{\text{Pr}^i\text{Benz}}]\text{NiBr} \cdot \text{THF}$  (solvent not shown for clarity)*

**Table 1.** Crystal, intensity collection, and refinement data.

|                                          | [Tism <sup>Pr<sup>i</sup>Benz</sup> ] <b>Li</b>                  | [Tism <sup>Pr<sup>i</sup>Benz</sup> ] <b>H • 1.5(C<sub>6</sub>H<sub>6</sub>)</b> |
|------------------------------------------|------------------------------------------------------------------|----------------------------------------------------------------------------------|
| lattice                                  | Cubic                                                            | Triclinic                                                                        |
| formula                                  | C <sub>37</sub> H <sub>51</sub> LiN <sub>6</sub> Si <sub>3</sub> | C <sub>46</sub> H <sub>61</sub> N <sub>6</sub> Si <sub>3</sub>                   |
| formula weight                           | 671.04                                                           | 782.27                                                                           |
| space group                              | <i>I</i> 23                                                      | <i>P</i> -1                                                                      |
| <i>a</i> /Å                              | 20.191(2)                                                        | 10.1605(10)                                                                      |
| <i>b</i> /Å                              | 20.191(2)                                                        | 15.4631(16)                                                                      |
| <i>c</i> /Å                              | 20.191(2)                                                        | 15.8502(16)                                                                      |
| $\alpha$ /°                              | 90                                                               | 65.3205(14)                                                                      |
| $\beta$ /°                               | 90                                                               | 86.4167(16)                                                                      |
| $\gamma$ /°                              | 90                                                               | 79.4613(15)                                                                      |
| <i>V</i> /Å <sup>3</sup>                 | 8231(3)                                                          | 2224.4(4)                                                                        |
| <i>Z</i>                                 | 8                                                                | 2                                                                                |
| temperature (K)                          | 130(2)                                                           | 130(2)                                                                           |
| radiation ( $\lambda$ , Å)               | 0.71073                                                          | 0.71073                                                                          |
| $\rho$ (calcd.) g cm <sup>-3</sup>       | 1.083                                                            | 1.168                                                                            |
| $\mu$ (Mo K $\alpha$ ), mm <sup>-1</sup> | 0.146                                                            | 0.145                                                                            |
| $\theta$ max, deg.                       | 30.509                                                           | 30.625                                                                           |
| no. of data collected                    | 65610                                                            | 36500                                                                            |
| no. of data                              | 4198                                                             | 13593                                                                            |
| no. of parameters                        | 146                                                              | 512                                                                              |
| $R_1$ [ $I > 2\sigma(I)$ ]               | 0.0438                                                           | 0.0550                                                                           |
| $wR_2$ [ $I > 2\sigma(I)$ ]              | 0.1164                                                           | 0.1339                                                                           |
| $R_1$ [all data]                         | 0.0558                                                           | 0.0689                                                                           |
| $wR_2$ [all data]                        | 0.1285                                                           | 0.1402                                                                           |
| GOF                                      | 0.953                                                            | 1.090                                                                            |
| $R_{int}$                                | 0.0576                                                           | 0.0298                                                                           |

**Table 1. (cont.)** Crystal, intensity collection, and refinement data.

|                                         | $[\text{Tism}^{\text{Pr}^{\text{I}}\text{Benz}}]\text{MgMe}\cdot\text{C}_6\text{H}_6$ | $[\kappa^3\text{-Tism}^{\text{Pr}^{\text{I}}\text{Benz}}]\text{ZnMe}\cdot\text{C}_6\text{H}_6$ |
|-----------------------------------------|---------------------------------------------------------------------------------------|------------------------------------------------------------------------------------------------|
| lattice                                 | Monoclinic                                                                            | Triclinic                                                                                      |
| formula                                 | $\text{C}_{44}\text{H}_{60}\text{N}_6\text{Si}_3\text{Mg}$                            | $\text{C}_{41}\text{H}_{57}\text{N}_6\text{Si}_3\text{Zn}$                                     |
| formula weight                          | 781.56                                                                                | 783.56                                                                                         |
| space group                             | $P2_1/n$                                                                              | $P-1$                                                                                          |
| $a/\text{\AA}$                          | 12.8340(11)                                                                           | 11.1387(6)                                                                                     |
| $b/\text{\AA}$                          | 17.1903(15)                                                                           | 12.2980(7)                                                                                     |
| $c/\text{\AA}$                          | 20.4108(18)                                                                           | 17.7675(10)                                                                                    |
| $\alpha/^\circ$                         | 90                                                                                    | 79.0698(9)                                                                                     |
| $\beta/^\circ$                          | 98.1684(13)                                                                           | 75.1020(9)                                                                                     |
| $\gamma/^\circ$                         | 90                                                                                    | 65.8782(9)                                                                                     |
| $V/\text{\AA}^3$                        | 4457.4(7)                                                                             | 2136.8(2)                                                                                      |
| $Z$                                     | 4                                                                                     | 2                                                                                              |
| temperature (K)                         | 130(2)                                                                                | 130(2)                                                                                         |
| radiation ( $\lambda$ , $\text{\AA}$ )  | 0.71073                                                                               | 0.71073                                                                                        |
| $\rho$ (calcd.) $\text{g cm}^{-3}$      | 1.165                                                                                 | 1.218                                                                                          |
| $\mu$ (Mo $K\alpha$ ), $\text{mm}^{-1}$ | 0.158                                                                                 | 0.694                                                                                          |
| $\theta$ max, deg.                      | 30.596                                                                                | 30.539                                                                                         |
| no. of data collected                   | 72760                                                                                 | 13016                                                                                          |
| no. of data                             | 13721                                                                                 | 13016                                                                                          |
| no. of parameters                       | 471                                                                                   | 474                                                                                            |
| $R_1 [I > 2\sigma(I)]$                  | 0.0408                                                                                | 0.0602                                                                                         |
| $wR_2 [I > 2\sigma(I)]$                 | 0.1030                                                                                | 0.1248                                                                                         |
| $R_1$ [all data]                        | 0.0527                                                                                | 0.1170                                                                                         |
| $wR_2$ [all data]                       | 0.1121                                                                                | 0.1496                                                                                         |
| GOF                                     | 1.025                                                                                 | 1.038                                                                                          |
| $R_{\text{int}}$                        | 0.0333                                                                                | 0.0579                                                                                         |

**Table 1. (cont.)** Crystal, intensity collection, and refinement data.

|                                          | [Tism <sup>Pr<sup>i</sup>Benz</sup> ]Cu                          | [κ <sup>4</sup> -C <sub>4</sub> -<br>Tism <sup>Pr<sup>i</sup>Benz*</sup> ]Cu•0.5C <sub>6</sub> H <sub>6</sub> |
|------------------------------------------|------------------------------------------------------------------|---------------------------------------------------------------------------------------------------------------|
| lattice                                  | Cubic                                                            | Trigonal                                                                                                      |
| formula                                  | C <sub>37</sub> H <sub>51</sub> CuN <sub>6</sub> Si <sub>3</sub> | C <sub>80</sub> H <sub>108</sub> Cu <sub>2</sub> N <sub>12</sub> Si <sub>6</sub>                              |
| formula weight                           | 727.64                                                           | 1533.40                                                                                                       |
| space group                              | <i>I</i> 23                                                      | <i>R</i> -3                                                                                                   |
| <i>a</i> /Å                              | 20.1294(17)                                                      | 16.4836(19)                                                                                                   |
| <i>b</i> /Å                              | 20.1294(17)                                                      | 16.4836(19)                                                                                                   |
| <i>c</i> /Å                              | 20.1294(17)                                                      | 26.069(3)                                                                                                     |
| $\alpha$ /°                              | 90                                                               | 90                                                                                                            |
| $\beta$ /°                               | 90                                                               | 90                                                                                                            |
| $\gamma$ /°                              | 90                                                               | 120                                                                                                           |
| <i>V</i> /Å <sup>3</sup>                 | 8156(2)                                                          | 6134.3(16)                                                                                                    |
| <i>Z</i>                                 | 8                                                                | 3                                                                                                             |
| temperature (K)                          | 130(2)                                                           | 130(2)                                                                                                        |
| radiation ( $\lambda$ , Å)               | 0.71073                                                          | 0.71073                                                                                                       |
| $\rho$ (calcd.) g cm <sup>-3</sup>       | 1.185                                                            | 1.245                                                                                                         |
| $\mu$ (Mo K $\alpha$ ), mm <sup>-1</sup> | 0.656                                                            | 0.657                                                                                                         |
| $\theta$ max, deg.                       | 30.490                                                           | 30.548                                                                                                        |
| no. of data collected                    | 66485                                                            | 33358                                                                                                         |
| no. of data                              | 4176                                                             | 4192                                                                                                          |
| no. of parameters                        | 145                                                              | 155                                                                                                           |
| $R_1$ [ $I > 2\sigma(I)$ ]               | 0.0511                                                           | 0.0325                                                                                                        |
| $wR_2$ [ $I > 2\sigma(I)$ ]              | 0.1043                                                           | 0.0861                                                                                                        |
| $R_1$ [all data]                         | 0.0874                                                           | 0.0358                                                                                                        |
| $wR_2$ [all data]                        | 0.1177                                                           | 0.0903                                                                                                        |
| GOF                                      | 1.022                                                            | 0.960                                                                                                         |
| $R_{int}$                                | 0.1838                                                           | 0.0264                                                                                                        |



**Table 1. (cont.)** Crystal, intensity collection, and refinement data.

|                                          | [Tism <sup>Pr<sup>1</sup>Benz</sup> ]NiBr•THF                       | [Tism <sup>Pr<sup>1</sup>Benz</sup> ]NiBr•C <sub>6</sub> H <sub>6</sub> |
|------------------------------------------|---------------------------------------------------------------------|-------------------------------------------------------------------------|
| lattice                                  | Triclinic                                                           | Monoclinic                                                              |
| formula                                  | C <sub>41</sub> H <sub>59</sub> BrN <sub>6</sub> NiOSi <sub>3</sub> | C <sub>43</sub> H <sub>57</sub> BrN <sub>6</sub> NiSi <sub>3</sub>      |
| formula weight                           | 874.83                                                              | 880.83                                                                  |
| space group                              | <i>P</i> -1                                                         | <i>P</i> 2 <sub>1</sub> / <i>c</i>                                      |
| <i>a</i> /Å                              | 9.4796(9)                                                           | 12.702(3)                                                               |
| <i>b</i> /Å                              | 15.2993(14)                                                         | 18.819(5)                                                               |
| <i>c</i> /Å                              | 15.5434(14)                                                         | 18.915(5)                                                               |
| $\alpha$ /°                              | 89.3810(10)                                                         | 90                                                                      |
| $\beta$ /°                               | 78.4190(10)                                                         | 105.630(4)                                                              |
| $\gamma$ /°                              | 77.8830(10)                                                         | 90                                                                      |
| <i>V</i> /Å <sup>3</sup>                 | 2158.0(3)                                                           | 4354.3(19)                                                              |
| <i>Z</i>                                 | 2                                                                   | 4                                                                       |
| temperature (K)                          | 130(2)                                                              | 130(2)                                                                  |
| radiation ( $\lambda$ , Å)               | 0.71073                                                             | 0.71073                                                                 |
| $\rho$ (calcd.) g cm <sup>-3</sup>       | 1.346                                                               | 1.344                                                                   |
| $\mu$ (Mo K $\alpha$ ), mm <sup>-1</sup> | 1.498                                                               | 1.483                                                                   |
| $\theta$ max, deg.                       | 32.918                                                              | 30.560                                                                  |
| no. of data collected                    | 38415                                                               | 70162                                                                   |
| no. of data                              | 15099                                                               | 13279                                                                   |
| no. of parameters                        | 490                                                                 | 499                                                                     |
| $R_1$ [ $I > 2\sigma(I)$ ]               | 0.0398                                                              | 0.0620                                                                  |
| $wR_2$ [ $I > 2\sigma(I)$ ]              | 0.0922                                                              | 0.1074                                                                  |
| $R_1$ [all data]                         | 0.0618                                                              | 0.1580                                                                  |
| $wR_2$ [all data]                        | 0.1003                                                              | 0.1354                                                                  |
| GOF                                      | 1.057                                                               | 0.999                                                                   |
| $R_{int}$                                | 0.0316                                                              | 0.1673                                                                  |

**Table 2.** Cartesian Coordinates for Geometry Optimized Compounds

| [Tism <sup>Pr<sup>i</sup>Benz</sup> ] <sub>2</sub> Li |               |               |               |
|-------------------------------------------------------|---------------|---------------|---------------|
| atom                                                  | x             | y             | z             |
| Li                                                    | 0.0000000000  | 0.0000000000  | -0.4086697850 |
| Si                                                    | -0.8549859254 | -1.6017659946 | 2.0412593996  |
| N                                                     | -0.0251719394 | -2.0099177932 | -0.6470532783 |
| N                                                     | -0.7629603951 | -3.9674287699 | 0.1448327903  |
| C                                                     | 0.0000000000  | 0.0000000000  | 1.8730850499  |
| C                                                     | -2.7568822645 | -1.5107116149 | 2.1214500123  |
| H                                                     | -3.0945305309 | -1.1178661697 | 3.0860016316  |
| H                                                     | -3.1944111119 | -2.5098443152 | 2.0094764525  |
| H                                                     | -3.1702909094 | -0.8801099165 | 1.3285752701  |
| C                                                     | -0.3456847407 | -2.6895394153 | 3.5336815012  |
| H                                                     | -1.1386207320 | -3.3826333448 | 3.8392467348  |
| H                                                     | -0.1465769778 | -2.0356529793 | 4.3901795433  |
| H                                                     | 0.5603926074  | -3.2764135904 | 3.3550925350  |
| C                                                     | -0.5214623018 | -2.6297548560 | 0.4222601397  |
| C                                                     | 0.0743371079  | -2.9522490683 | -1.6521727672 |
| C                                                     | 0.5452513641  | -2.8178972596 | -2.9641413901 |
| H                                                     | 0.9115475891  | -1.8594642323 | -3.3197670323 |
| C                                                     | 0.5368100668  | -3.9434484665 | -3.7780710199 |
| H                                                     | 0.8970064562  | -3.8711660063 | -4.8001656989 |
| C                                                     | 0.0720059864  | -5.1832272700 | -3.2985446954 |
| H                                                     | 0.0796111709  | -6.0449092060 | -3.9599689615 |

|    |               |               |               |
|----|---------------|---------------|---------------|
| C  | -0.3946927838 | -5.3347735881 | -1.9964236752 |
| H  | -0.7434364826 | -6.3003134989 | -1.6486770521 |
| C  | -0.3887617156 | -4.1995424893 | -1.1749022836 |
| C  | -1.3527430617 | -4.9434477131 | 1.0750481201  |
| H  | -1.5366551537 | -4.3828574773 | 1.9916255761  |
| C  | -0.3656882612 | -6.0704587226 | 1.4101379338  |
| H  | 0.5690870646  | -5.6594904566 | 1.8020739679  |
| H  | -0.1272879328 | -6.6802424614 | 0.5344663556  |
| H  | -0.7968749589 | -6.7284444005 | 2.1714570731  |
| C  | -2.7067478884 | -5.4588390007 | 0.5663871928  |
| H  | -3.3860183550 | -4.6249550976 | 0.3667384201  |
| H  | -3.1658760537 | -6.1026437801 | 1.3235571235  |
| H  | -2.6063608795 | -6.0408036294 | -0.3533639769 |
| Si | -0.9596770796 | 1.5413225286  | 2.0412593996  |
| N  | -1.7280538987 | 1.0267584356  | -0.6470532783 |
| N  | -3.0544139049 | 2.6444574692  | 0.1448327903  |
| C  | 0.0701264959  | 3.1428858838  | 2.1214500123  |
| H  | 0.5791647644  | 3.2388751374  | 3.0860016316  |
| H  | -0.5763833805 | 4.0213633306  | 2.0094764525  |
| H  | 0.8229479089  | 3.1856074232  | 1.3285752701  |
| C  | -2.1563670878 | 1.6441414748  | 3.5336815012  |
| H  | -2.3601360423 | 2.6773911516  | 3.8392467348  |
| H  | -1.6896387045 | 1.1447658761  | 4.3901795433  |
| H  | -3.1176537063 | 1.1528925611  | 3.3550925350  |
| C  | -2.0167033602 | 1.7664770285  | 0.4222601397  |
| C  | -2.5938912454 | 1.4117467102  | -1.6521727672 |
| C  | -2.7129962941 | 0.9367470971  | -2.9641413901 |
| H  | -2.0661170571 | 0.1403087472  | -3.3197670323 |

|    |               |               |               |
|----|---------------|---------------|---------------|
| C  | -3.6835315839 | 1.5068330784  | -3.7780710199 |
| H  | -3.8010313319 | 1.1587526247  | -4.8001656989 |
| C  | -4.5248094826 | 2.5292546215  | -3.2985446954 |
| H  | -5.2748505214 | 2.9535093066  | -3.9599689615 |
| C  | -4.4227030589 | 3.0092007716  | -1.9964236752 |
| H  | -5.0845133006 | 3.7939916295  | -1.6486770521 |
| C  | -3.4425296222 | 2.4364487664  | -1.1749022836 |
| C  | -3.6047797709 | 3.6432337128  | 1.0750481201  |
| H  | -3.0273383396 | 3.5222111386  | 1.9916255761  |
| C  | -5.0743273358 | 3.3519246853  | 1.4101379338  |
| H  | -5.1858060402 | 2.3369013734  | 1.8020739679  |
| H  | -5.7216157086 | 3.4503558141  | 0.5344663556  |
| H  | -5.4285662993 | 4.0543361583  | 2.1714570731  |
| C  | -3.3741193056 | 5.0735319333  | 0.5663871928  |
| H  | -2.3123194283 | 5.2448554619  | 0.3667384201  |
| H  | -3.7021065170 | 5.7930509778  | 1.3235571235  |
| H  | -3.9283089626 | 5.2775765477  | -0.3533639769 |
| Si | 1.8146630050  | 0.0604434660  | 2.0412593996  |
| N  | 1.7532258381  | 0.9831593576  | -0.6470532783 |
| N  | 3.8173743000  | 1.3229713007  | 0.1448327903  |
| C  | 2.6867557686  | -1.6321742689 | 2.1214500123  |
| H  | 2.5153657665  | -2.1210089677 | 3.0860016316  |
| H  | 3.7707944924  | -1.5115190155 | 2.0094764525  |
| H  | 2.3473430005  | -2.3054975067 | 1.3285752701  |
| C  | 2.5020518284  | 1.0453979405  | 3.5336815012  |
| H  | 3.4987567743  | 0.7052421932  | 3.8392467348  |
| H  | 1.8362156823  | 0.8908871033  | 4.3901795433  |
| H  | 2.5572610989  | 2.1235210293  | 3.3550925350  |

|   |              |               |               |
|---|--------------|---------------|---------------|
| C | 2.5381656619 | 0.8632778276  | 0.4222601397  |
| C | 2.5195541375 | 1.5405023580  | -1.6521727672 |
| C | 2.1677449301 | 1.8811501625  | -2.9641413901 |
| H | 1.1545694680 | 1.7191554850  | -3.3197670323 |
| C | 3.1467215171 | 2.4366153881  | -3.7780710199 |
| H | 2.9040248757 | 2.7124133816  | -4.8001656989 |
| C | 4.4528034962 | 2.6539726484  | -3.2985446954 |
| H | 5.1952393505 | 3.0913998994  | -3.9599689615 |
| C | 4.8173958427 | 2.3255728166  | -1.9964236752 |
| H | 5.8279497832 | 2.5063218694  | -1.6486770521 |
| C | 3.8312913378 | 1.7630937229  | -1.1749022836 |
| C | 4.9575228327 | 1.3002140003  | 1.0750481201  |
| H | 4.5639934933 | 0.8606463387  | 1.9916255761  |
| C | 5.4400155970 | 2.7185340373  | 1.4101379338  |
| H | 4.6167189756 | 3.3225890832  | 1.8020739679  |
| H | 5.8489036414 | 3.2298866473  | 0.5344663556  |
| H | 6.2254412583 | 2.6741082422  | 2.1714570731  |
| C | 6.0808671940 | 0.3853070674  | 0.5663871928  |
| H | 5.6983377834 | -0.6199003644 | 0.3667384201  |
| H | 6.8679825707 | 0.3095928023  | 1.3235571235  |
| H | 6.5346698420 | 0.7632270817  | -0.3533639769 |

---

[Tism<sup>Pr<sup>i</sup>Benz</sup>]<sup>-</sup> (3:0 conformation)

---

| atom | x             | y             | z             |
|------|---------------|---------------|---------------|
| Si   | -0.6011214160 | -1.7003981850 | 2.3117914256  |
| N    | 0.9319953837  | -2.0024674719 | -0.0745527303 |
| N    | -0.6607897850 | -3.5848330061 | -0.0855958403 |

|   |               |               |               |
|---|---------------|---------------|---------------|
| C | 0.0000000000  | 0.0000000000  | 2.4850316125  |
| C | -2.4884476661 | -1.8665868969 | 2.5900452427  |
| H | -2.7235422513 | -1.3803410168 | 3.5423304692  |
| H | -2.8273253589 | -2.9042049212 | 2.6867842929  |
| H | -3.0662939341 | -1.3788763153 | 1.8012621358  |
| C | 0.0729311845  | -3.0123758995 | 3.5475033994  |
| H | -0.4848775735 | -3.9541215428 | 3.4497935422  |
| H | -0.0633334725 | -2.6548378486 | 4.5757274611  |
| H | 1.1317545720  | -3.2437991096 | 3.4107800568  |
| C | -0.0994333595 | -2.4926118045 | 0.5948660820  |
| C | 1.0542396290  | -2.7507745256 | -1.2249998193 |
| C | 1.9690693462  | -2.6254105038 | -2.2779994958 |
| H | 2.7122572830  | -1.8343640016 | -2.2556213260 |
| C | 1.8795385447  | -3.5138963137 | -3.3451250597 |
| H | 2.5753998263  | -3.4318161575 | -4.1762328931 |
| C | 0.8871739295  | -4.5120114205 | -3.3720957189 |
| H | 0.8336524366  | -5.1893194538 | -4.2212141943 |
| C | -0.0388317138 | -4.6477432524 | -2.3383255976 |
| H | -0.8028308648 | -5.4166826505 | -2.3884142056 |
| C | 0.0569730993  | -3.7576831738 | -1.2606762469 |
| C | -1.7773443097 | -4.4117618456 | 0.3783517719  |
| H | -2.0275426382 | -4.0196558054 | 1.3618697531  |
| C | -1.3630322943 | -5.8800851920 | 0.5652723977  |
| H | -0.4992662974 | -5.9495910431 | 1.2332395187  |
| H | -1.0989272360 | -6.3603428641 | -0.3808672825 |
| H | -2.1893444739 | -6.4451053301 | 1.0110954631  |
| C | -3.0166504568 | -4.2461963735 | -0.5138280939 |
| H | -3.3062996340 | -3.1932133415 | -0.5614162534 |

|    |               |               |               |
|----|---------------|---------------|---------------|
| H  | -3.8572526547 | -4.8176319880 | -0.1038970205 |
| H  | -2.8336253748 | -4.5985044511 | -1.5337667508 |
| Si | -1.1720273168 | 1.3707855095  | 2.3117914256  |
| N  | -2.2001853928 | 0.1941020574  | -0.0745527303 |
| N  | -2.7741615591 | 2.3646772434  | -0.0855958403 |
| C  | -0.3722878380 | 3.0883523433  | 2.5900452427  |
| H  | 0.1663607393  | 3.0488272863  | 3.5423304692  |
| H  | -1.1014525601 | 3.9006380462  | 2.6867842929  |
| H  | 0.3390050494  | 3.3449266001  | 1.8012621358  |
| C  | -2.6452596469 | 1.4430276912  | 3.5475033994  |
| H  | -3.1819309190 | 2.3969770677  | 3.4497935422  |
| H  | -2.2674902836 | 1.3822673204  | 4.5757274611  |
| H  | -3.3750897197 | 0.6417713446  | 3.4107800568  |
| C  | -2.1089484647 | 1.3324177176  | 0.5948660820  |
| C  | -2.9093604338 | 0.4623889624  | -1.2249998193 |
| C  | -3.2582068648 | -0.3925588237 | -2.2779994958 |
| H  | -2.9447344667 | -1.4317017078 | -2.2556213260 |
| C  | -3.9828927463 | 0.1292200297  | -3.3451250597 |
| H  | -4.2597398866 | -0.5144535957 | -4.1762328931 |
| C  | -4.3511034771 | 1.4876905498  | -3.3720957189 |
| H  | -4.9109086936 | 1.8726955389  | -4.2212141943 |
| C  | -4.0056478699 | 2.3575008768  | -2.3383255976 |
| H  | -4.2895693472 | 3.4036132491  | -2.3884142056 |
| C  | -3.2827356375 | 1.8295014356  | -1.2606762469 |
| C  | -2.9320256789 | 3.7451062463  | 0.3783517719  |
| H  | -2.4673527228 | 3.7657313346  | 1.3618697531  |
| C  | -4.4107870056 | 4.1204631890  | 0.5652723977  |
| H  | -4.9028638367 | 3.4071728184  | 1.2332395187  |

|    |               |               |               |
|----|---------------|---------------|---------------|
| H  | -4.9587548791 | 4.1318703353  | -0.3808672825 |
| H  | -4.4869527090 | 5.1185805971  | 1.0110954631  |
| C  | -2.1689887005 | 4.7355941167  | -0.5138280939 |
| H  | -1.1122540565 | 4.4599461463  | -0.5614162534 |
| H  | -2.2435653603 | 5.7492947817  | -0.1038970205 |
| H  | -2.5656089867 | 4.7532437850  | -1.5337667508 |
| Si | 1.7731487328  | 0.3296126755  | 2.3117914256  |
| N  | 1.2681900090  | 1.8083654145  | -0.0745527303 |
| N  | 3.4349513441  | 1.2201557627  | -0.0855958403 |
| C  | 2.8607355042  | -1.2217654464 | 2.5900452427  |
| H  | 2.5571815121  | -1.6684862696 | 3.5423304692  |
| H  | 3.9287779190  | -0.9964331250 | 2.6867842929  |
| H  | 2.7272888848  | -1.9660502848 | 1.8012621358  |
| C  | 2.5723284624  | 1.5693482082  | 3.5475033994  |
| H  | 3.6668084924  | 1.5571444750  | 3.4497935422  |
| H  | 2.3308237561  | 1.2725705282  | 4.5757274611  |
| H  | 2.2433351477  | 2.6020277650  | 3.4107800568  |
| C  | 2.2083818242  | 1.1601940869  | 0.5948660820  |
| C  | 1.8551208047  | 2.2883855632  | -1.2249998193 |
| C  | 1.2891375186  | 3.0179693275  | -2.2779994958 |
| H  | 0.2324771837  | 3.2660657095  | -2.2556213260 |
| C  | 2.1033542016  | 3.3846762839  | -3.3451250597 |
| H  | 1.6843400603  | 3.9462697532  | -4.1762328931 |
| C  | 3.4639295476  | 3.0243208708  | -3.3720957189 |
| H  | 4.0772562570  | 3.3166239149  | -4.2212141943 |
| C  | 4.0444795837  | 2.2902423756  | -2.3383255976 |
| H  | 5.0924002119  | 2.0130694014  | -2.3884142056 |
| C  | 3.2257625383  | 1.9281817382  | -1.2606762469 |



|   |              |               |               |
|---|--------------|---------------|---------------|
| C | 4.7093699886 | 0.6666555993  | 0.3783517719  |
| H | 4.4948953610 | 0.2539244707  | 1.3618697531  |
| C | 5.7738192998 | 1.7596220030  | 0.5652723977  |
| H | 5.4021301342 | 2.5424182247  | 1.2332395187  |
| H | 6.0576821151 | 2.2284725288  | -0.3808672825 |
| H | 6.6762971829 | 1.3265247330  | 1.0110954631  |
| C | 5.1856391573 | -0.4893977432 | -0.5138280939 |
| H | 4.4185536904 | -1.2667328048 | -0.5614162534 |
| H | 6.1008180150 | -0.9316627938 | -0.1038970205 |
| H | 5.3992343615 | -0.1547393338 | -1.5337667508 |

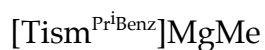

| atom | x             | y             | z             |
|------|---------------|---------------|---------------|
| Mg   | 3.5298861673  | 13.7769219536 | 0.2826572519  |
| N    | 1.4632843455  | 14.2703737116 | -0.4817126906 |
| N    | -0.7390347048 | 14.6076566209 | -0.3034041575 |
| N    | 4.4602084926  | 11.8390189659 | -0.4176683378 |
| N    | 4.4473378243  | 9.6905507958  | -1.0362779247 |
| N    | 4.0716870996  | 14.5022022475 | 2.3523476693  |
| N    | 4.5920143304  | 14.2628221872 | 4.5133100807  |
| Si   | 0.6351280288  | 13.0889426893 | 1.9247214881  |
| Si   | 2.0659985153  | 10.7162190233 | 0.5224307565  |
| Si   | 3.2604611366  | 11.9283130415 | 3.1213373415  |
| C    | 4.6896304376  | 15.1769169736 | -0.8938549006 |
| H    | 5.6947804802  | 15.3729469201 | -0.4827364943 |
| H    | 4.2211853658  | 16.1718754192 | -0.9879102883 |
| H    | 4.8653812153  | 14.8452181352 | -1.9312885877 |

|   |               |               |               |
|---|---------------|---------------|---------------|
| C | 2.1833381779  | 12.1490481057 | 1.6565494824  |
| C | -0.9074335086 | 12.0327247056 | 2.3356392679  |
| H | -1.7604414466 | 12.6152383475 | 2.7025422631  |
| H | -0.6313507805 | 11.3393628748 | 3.1392835469  |
| H | -1.2531607755 | 11.4240589349 | 1.4936751641  |
| C | 0.6667710376  | 14.4539467516 | 3.2516272234  |
| H | -0.2856102205 | 14.9977454980 | 3.2488352836  |
| H | 1.4675750120  | 15.1754664360 | 3.0710360508  |
| H | 0.7994166797  | 14.0457985613 | 4.2597328581  |
| C | 0.3850540976  | 14.0515162078 | 0.2712961440  |
| C | 1.0398708518  | 14.9822060477 | -1.5953648314 |
| C | 1.7637683723  | 15.4474472886 | -2.7016029663 |
| H | 2.8338007304  | 15.2885688969 | -2.7583470015 |
| C | 1.0648127934  | 16.1216312972 | -3.6945648099 |
| H | 1.5984574236  | 16.4952023582 | -4.5636948357 |
| C | -0.3244012456 | 16.3345176790 | -3.5976632606 |
| H | -0.8386786524 | 16.8655168308 | -4.3937684653 |
| C | -1.0559947816 | 15.8799507697 | -2.5061603684 |
| H | -2.1247605305 | 16.0506893266 | -2.4507345297 |
| C | -0.3526256972 | 15.1993047653 | -1.5031941852 |
| C | -2.0897284120 | 14.6028672252 | 0.2838733133  |
| H | -1.9775371073 | 14.0868461328 | 1.2371545803  |
| C | -2.5779695931 | 16.0274798450 | 0.5822922011  |
| H | -3.5364839185 | 15.9862303867 | 1.1095991518  |
| H | -2.7199497128 | 16.6134313915 | -0.3292098551 |
| H | -1.8597595356 | 16.5559419882 | 1.2159173552  |
| C | -3.0732296131 | 13.7924269195 | -0.5719306704 |
| H | -4.0407984795 | 13.7255510138 | -0.0641304736 |

|   |               |               |               |
|---|---------------|---------------|---------------|
| H | -2.6986130158 | 12.7772113994 | -0.7312345488 |
| H | -3.2372831942 | 14.2500923432 | -1.5510380650 |
| C | 1.7205512288  | 9.0304891127  | 1.3607739327  |
| H | 1.4446021086  | 8.2332520415  | 0.6608924546  |
| H | 0.8679267000  | 9.1639447971  | 2.0375447237  |
| H | 2.5570254878  | 8.6696540660  | 1.9683458617  |
| C | 0.8007675941  | 10.8317686774 | -0.8958402474 |
| H | 0.8969945657  | 9.9585953228  | -1.5524358657 |
| H | 0.9531914959  | 11.7280039177 | -1.5025937371 |
| H | -0.2310768301 | 10.8432851599 | -0.5279052735 |
| C | 3.7733662168  | 10.6965505181 | -0.3750416722 |
| C | 5.6312814752  | 11.5789731581 | -1.1158834966 |
| C | 6.7056046215  | 12.4229999611 | -1.4273915914 |
| H | 6.6826475150  | 13.4651913750 | -1.1330541608 |
| C | 7.7726178422  | 11.8786335797 | -2.1304081247 |
| H | 8.6194478867  | 12.5081357425 | -2.3879144035 |
| C | 7.7796105608  | 10.5250394497 | -2.5201183438 |
| H | 8.6315929185  | 10.1331892727 | -3.0684886554 |
| C | 6.7211486454  | 9.6754986211  | -2.2189379605 |
| H | 6.7461376444  | 8.6360748039  | -2.5245640566 |
| C | 5.6433987555  | 10.2228239482 | -1.5100005165 |
| C | 3.9512978517  | 8.3183864998  | -1.2360930049 |
| H | 2.9701731125  | 8.3044243905  | -0.7617493317 |
| C | 3.7509870282  | 8.0045160697  | -2.7256548717 |
| H | 3.2865206262  | 7.0193185560  | -2.8358513210 |
| H | 4.6956706756  | 7.9947350372  | -3.2750050509 |
| H | 3.0963544094  | 8.7469814661  | -3.1912831739 |
| C | 4.8334450705  | 7.2901361830  | -0.5144134388 |

|   |              |               |               |
|---|--------------|---------------|---------------|
| H | 4.3889512319 | 6.2933582150  | -0.6001697555 |
| H | 4.9213961130 | 7.5362815874  | 0.5477293092  |
| H | 5.8410024219 | 7.2473529206  | -0.9364827894 |
| C | 2.3792938117 | 11.3141912647 | 4.7049650182  |
| H | 3.0628821514 | 10.9883001207 | 5.4974799792  |
| H | 1.7759379584 | 10.4403599839 | 4.4306639657  |
| H | 1.6945587505 | 12.0530306081 | 5.1342695836  |
| C | 4.7717837578 | 10.7873397376 | 2.9225127590  |
| H | 5.3800560130 | 10.8124357792 | 3.8347770038  |
| H | 5.4047943452 | 11.0960564322 | 2.0866758344  |
| H | 4.4816293043 | 9.7434581601  | 2.7600519271  |
| C | 4.0283883750 | 13.6768122002 | 3.3989525002  |
| C | 4.9999995603 | 15.5453847749 | 4.1559883742  |
| C | 5.6018297141 | 16.5929510688 | 4.8670454555  |
| H | 5.8577416884 | 16.5090341414 | 5.9168281146  |
| C | 5.8616474597 | 17.7672649694 | 4.1689152424  |
| H | 6.3266369341 | 18.5994590558 | 4.6899453498  |
| C | 5.5358008955 | 17.9018977670 | 2.8050977507  |
| H | 5.7578958769 | 18.8358019107 | 2.2970866239  |
| C | 4.9399691068 | 16.8654089915 | 2.0988739794  |
| H | 4.6964165703 | 16.9519825973 | 1.0470790560  |
| C | 4.6700310358 | 15.6759087553 | 2.7889650934  |
| C | 4.7638731175 | 13.6141104267 | 5.8243418192  |
| H | 4.3629999961 | 12.6091432263 | 5.6931364480  |
| C | 3.9319455216 | 14.3098337254 | 6.9108593972  |
| H | 4.0041309923 | 13.7512720970 | 7.8496360993  |
| H | 2.8788090535 | 14.3553074698 | 6.6189197927  |
| H | 4.2754689309 | 15.3305274624 | 7.0986706573  |

|   |              |               |              |
|---|--------------|---------------|--------------|
| C | 6.2480567529 | 13.4768807426 | 6.1930206767 |
| H | 6.3468662920 | 12.9024807385 | 7.1197588417 |
| H | 6.7254140288 | 14.4479741824 | 6.3461902848 |
| H | 6.7941156031 | 12.9521425168 | 5.4037016574 |

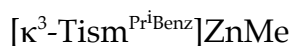

| atom | x             | y            | z             |
|------|---------------|--------------|---------------|
| Zn   | 9.4403969630  | 5.5973893150 | 14.4902313570 |
| Si   | 9.8357372679  | 5.4993957231 | 11.2671706100 |
| Si   | 11.9149801748 | 4.0853299289 | 13.0980686463 |
| Si   | 8.9919070494  | 2.8871858201 | 12.7714275204 |
| N    | 8.3111073931  | 6.9239995182 | 13.1709075279 |
| N    | 7.7548818910  | 7.7062289986 | 11.1598051912 |
| N    | 11.4728398336 | 6.4656302027 | 14.5786639259 |
| N    | 13.6783800121 | 6.2018082552 | 14.3777277319 |
| N    | 10.5814851376 | 1.6728680605 | 10.7368001210 |
| N    | 8.8648750184  | 0.3095337748 | 11.2364546173 |
| C    | 10.1229192155 | 4.3585420877 | 12.7081080631 |
| C    | 8.5966605458  | 5.2640988081 | 16.3460342014 |
| H    | 7.5957411312  | 4.8165740581 | 16.2878513896 |
| H    | 8.4923716718  | 6.2087087908 | 16.8992233494 |
| H    | 9.2072331250  | 4.6030700098 | 16.9754364204 |
| C    | 9.2671859359  | 4.6929885325 | 9.6373619278  |
| H    | 9.4796393262  | 5.3299960499 | 8.7706987210  |
| H    | 8.2033282177  | 4.4362649837 | 9.6107889524  |
| H    | 9.8299238598  | 3.7623423275 | 9.5100976276  |
| C    | 11.2878408052 | 6.6344019199 | 10.7762211013 |

|   |               |               |               |
|---|---------------|---------------|---------------|
| H | 10.9226853936 | 7.4408537786  | 10.1285320432 |
| H | 12.0469806410 | 6.0871713110  | 10.2091626384 |
| H | 11.7697135448 | 7.1010575724  | 11.6402895483 |
| C | 13.1150483189 | 3.8155850659  | 11.6428019811 |
| H | 13.9941240207 | 3.2368609359  | 11.9513462805 |
| H | 13.4671795892 | 4.7368994899  | 11.1705057374 |
| H | 12.5810180111 | 3.2184901521  | 10.8967565645 |
| C | 12.2876762762 | 2.6815423093  | 14.3240015434 |
| H | 13.3488392571 | 2.6976149369  | 14.6008753335 |
| H | 12.0893412280 | 1.7077236163  | 13.8630525935 |
| H | 11.7010376328 | 2.7525953965  | 15.2439473337 |
| C | 7.1872526432  | 3.3996488141  | 12.4155143028 |
| H | 6.4854795225  | 2.5686301162  | 12.5466355438 |
| H | 7.0428353694  | 3.7892817078  | 11.4030966833 |
| H | 6.8863705180  | 4.1879688045  | 13.1150852682 |
| C | 8.9473821254  | 1.9981372291  | 14.4579860465 |
| H | 8.0570976657  | 1.3646918767  | 14.5455893898 |
| H | 8.9039406868  | 2.7265033988  | 15.2739731315 |
| H | 9.8204034554  | 1.3608534863  | 14.6222147560 |
| C | 8.5075504037  | 6.7851616260  | 11.8609526309 |
| C | 7.4059502654  | 7.9533657042  | 13.3501717123 |
| C | 6.8691462950  | 8.4863015866  | 14.5282836536 |
| H | 7.1506419267  | 8.0769926595  | 15.4935084952 |
| C | 5.9687793108  | 9.5370538902  | 14.4093707763 |
| H | 5.5332348937  | 9.9747747542  | 15.3029300882 |
| C | 5.6052010514  | 10.0457757883 | 13.1468470149 |
| H | 4.8973411835  | 10.8679049461 | 13.0897615915 |
| C | 6.1273590695  | 9.5218287805  | 11.9684937169 |

|   |               |               |               |
|---|---------------|---------------|---------------|
| H | 5.8299504796  | 9.9277718987  | 11.0084628839 |
| C | 7.0393684555  | 8.4641067542  | 12.0858283848 |
| C | 7.7435591787  | 7.8651679251  | 9.6931050806  |
| H | 8.4407452669  | 7.1121789974  | 9.3246563240  |
| C | 8.2765829248  | 9.2426664854  | 9.2739985453  |
| H | 8.3501756467  | 9.2933806583  | 8.1828528979  |
| H | 9.2722963778  | 9.4166603460  | 9.6927390674  |
| H | 7.6244878612  | 10.0552976178 | 9.6050044758  |
| C | 6.3616536574  | 7.5464554566  | 9.1061434823  |
| H | 6.4060981137  | 7.5822890145  | 8.0128767526  |
| H | 5.6011914052  | 8.2596636773  | 9.4360588990  |
| H | 6.0385121583  | 6.5443950007  | 9.4029793222  |
| C | 12.4325002508 | 5.6963757747  | 14.0623163359 |
| C | 13.4907412623 | 7.3587701967  | 15.1327507741 |
| C | 14.3674201547 | 8.2830136718  | 15.7174961516 |
| H | 15.4445579468 | 8.1912984516  | 15.6364842946 |
| C | 13.8018969204 | 9.3429103353  | 16.4197414031 |
| H | 14.4564037381 | 10.0745511440 | 16.8852097080 |
| C | 12.4057205880 | 9.4908100366  | 16.5423791647 |
| H | 12.0075070129 | 10.3327760237 | 17.1007780826 |
| C | 11.5359021407 | 8.5771776707  | 15.9603610778 |
| H | 10.4587811528 | 8.6804376872  | 16.0472012248 |
| C | 12.0908513560 | 7.5048108726  | 15.2506135556 |
| C | 14.9667634106 | 5.5868173941  | 14.0065274619 |
| H | 14.6981432140 | 4.6931713032  | 13.4423150801 |
| C | 15.7767950158 | 6.4987913749  | 13.0745188793 |
| H | 16.6793430695 | 5.9776875066  | 12.7391375693 |
| H | 16.0869003758 | 7.4227602752  | 13.5707059859 |

|   |               |               |               |
|---|---------------|---------------|---------------|
| H | 15.1895904028 | 6.7680496372  | 12.1916670454 |
| C | 15.7529663750 | 5.1387871389  | 15.2469766099 |
| H | 16.6545458774 | 4.6001833533  | 14.9373432596 |
| H | 15.1492965784 | 4.4685748378  | 15.8661202216 |
| H | 16.0628990734 | 5.9848287035  | 15.8664169045 |
| C | 9.4971459672  | 1.5305022168  | 11.4874759903 |
| C | 10.6796564943 | 0.5294162160  | 9.9675066283  |
| C | 11.6407583853 | 0.1790479383  | 9.0096951086  |
| H | 12.4608569771 | 0.8557280929  | 8.7881623110  |
| C | 11.5087417426 | -1.0438840202 | 8.3643166326  |
| H | 12.2393355912 | -1.3415925570 | 7.6171544676  |
| C | 10.4376858711 | -1.9096062971 | 8.6622919284  |
| H | 10.3610332906 | -2.8593285614 | 8.1397318080  |
| C | 9.4734013584  | -1.5797308148 | 9.6098008807  |
| H | 8.6582900646  | -2.2629879105 | 9.8203908389  |
| C | 9.6074882993  | -0.3460171880 | 10.2624704688 |
| C | 7.6498549646  | -0.1967643316 | 11.8955427356 |
| H | 7.3674195553  | 0.5790971100  | 12.6078384785 |
| C | 7.9345563689  | -1.4754821381 | 12.6974156292 |
| H | 7.0369984967  | -1.7785142529 | 13.2466941854 |
| H | 8.7372297116  | -1.3041571985 | 13.4205416230 |
| H | 8.2313859949  | -2.3069637382 | 12.0524969839 |
| C | 6.4921194740  | -0.3539045674 | 10.8988030361 |
| H | 5.5810654607  | -0.6525945757 | 11.4280305533 |
| H | 6.7050746805  | -1.1121863444 | 10.1403885449 |
| H | 6.2962676968  | 0.5922437948  | 10.3855766161 |

---



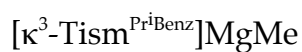

| atom | x             | y            | z             |
|------|---------------|--------------|---------------|
| Mg   | 9.4792598954  | 5.6653873854 | 14.4723383483 |
| Si   | 9.8418319355  | 5.5019908375 | 11.2655511415 |
| Si   | 11.9308371826 | 4.0973070233 | 13.0905253769 |
| Si   | 9.0097234063  | 2.8965926623 | 12.7678118735 |
| N    | 8.3153722457  | 6.9181967611 | 13.1865524988 |
| N    | 7.7432373484  | 7.6965583204 | 11.1791493067 |
| N    | 11.4700476450 | 6.4925316432 | 14.5509048622 |
| N    | 13.6764058245 | 6.2242921270 | 14.3762628465 |
| N    | 10.6061648756 | 1.6531966640 | 10.7539051842 |
| N    | 8.8460602986  | 0.3328165981 | 11.2159442597 |
| C    | 10.1436604777 | 4.3618816730 | 12.6973189855 |
| C    | 8.6158900143  | 5.2952495513 | 16.3816747681 |
| H    | 7.6057619356  | 4.8599517358 | 16.3516601408 |
| H    | 8.5167849778  | 6.2325474368 | 16.9542856009 |
| H    | 9.2108569039  | 4.6288584709 | 17.0244824207 |
| C    | 9.2705425378  | 4.6964983411 | 9.6367716462  |
| H    | 9.4722165640  | 5.3368926629 | 8.7705130176  |
| H    | 8.2105563365  | 4.4256002160 | 9.6145684053  |
| H    | 9.8456138421  | 3.7738348839 | 9.5074835552  |
| C    | 11.2812010558 | 6.6455734512 | 10.7592840614 |
| H    | 10.9045772519 | 7.4467888265 | 10.1123218892 |
| H    | 12.0353637317 | 6.0984822030 | 10.1858018851 |
| H    | 11.7709078222 | 7.1179387749 | 11.6153330561 |
| C    | 13.1374924790 | 3.8273620076 | 11.6422287315 |

|   |               |               |               |
|---|---------------|---------------|---------------|
| H | 14.0307959080 | 3.2759008718  | 11.9583833080 |
| H | 13.4652629077 | 4.7466483959  | 11.1495232523 |
| H | 12.6124729678 | 3.2031775133  | 10.9121843013 |
| C | 12.3119318696 | 2.7081993586  | 14.3297586532 |
| H | 13.3737293874 | 2.7315251025  | 14.6018884285 |
| H | 12.1148350882 | 1.7294518867  | 13.8794648610 |
| H | 11.7281059844 | 2.7876184165  | 15.2507251931 |
| C | 7.2053371598  | 3.4165016855  | 12.4127164779 |
| H | 6.4955464790  | 2.6034792034  | 12.5978471644 |
| H | 7.0499627568  | 3.7555697301  | 11.3839907791 |
| H | 6.9248102285  | 4.2422182586  | 13.0762081751 |
| C | 8.9643375703  | 2.0183501224  | 14.4572484673 |
| H | 8.0988226407  | 1.3498660756  | 14.5294409674 |
| H | 8.8735274810  | 2.7513075503  | 15.2660240139 |
| H | 9.8585795343  | 1.4185665332  | 14.6443657383 |
| C | 8.5088968950  | 6.7835478856  | 11.8727778386 |
| C | 7.3949024021  | 7.9356347865  | 13.3700774990 |
| C | 6.8508976632  | 8.4551194247  | 14.5516520217 |
| H | 7.1349455630  | 8.0414343210  | 15.5141310158 |
| C | 5.9374761281  | 9.4956440585  | 14.4384328376 |
| H | 5.4952773165  | 9.9226136189  | 15.3333214589 |
| C | 5.5692472406  | 10.0050936653 | 13.1770912361 |
| H | 4.8518969593  | 10.8187468807 | 13.1224575568 |
| C | 6.0967106489  | 9.4919774184  | 11.9962101209 |
| H | 5.7943031765  | 9.8978604848  | 11.0380571603 |
| C | 7.0208907944  | 8.4445617874  | 12.1083402570 |
| C | 7.7256686733  | 7.8527149681  | 9.7128289795  |
| H | 8.4274938501  | 7.1045832214  | 9.3445578539  |

|   |               |               |               |
|---|---------------|---------------|---------------|
| C | 8.2462280669  | 9.2332024259  | 9.2883768283  |
| H | 8.3202994168  | 9.2787042218  | 8.1972373987  |
| H | 9.2396939815  | 9.4183031690  | 9.7072172065  |
| H | 7.5856828870  | 10.0408038418 | 9.6143393280  |
| C | 6.3452825557  | 7.5217042241  | 9.1295531254  |
| H | 6.3893812995  | 7.5525001673  | 8.0363840550  |
| H | 5.5806515660  | 8.2317275950  | 9.4559151015  |
| H | 6.0294385113  | 6.5190451131  | 9.4314375902  |
| C | 12.4369647284 | 5.7173176091  | 14.0495193988 |
| C | 13.4826799248 | 7.3874192166  | 15.1198223497 |
| C | 14.3547384748 | 8.3159618156  | 15.7035517480 |
| H | 15.4319883383 | 8.2208520307  | 15.6348511063 |
| C | 13.7838426422 | 9.3841511554  | 16.3880746440 |
| H | 14.4342449071 | 10.1199879563 | 16.8517636136 |
| C | 12.3870419842 | 9.5355211356  | 16.4947640231 |
| H | 11.9844429308 | 10.3840048344 | 17.0393459985 |
| C | 11.5217059427 | 8.6167289357  | 15.9146779654 |
| H | 10.4442189947 | 8.7228783657  | 15.9908802611 |
| C | 12.0831782054 | 7.5366380905  | 15.2221289322 |
| C | 14.9665796800 | 5.6015437206  | 14.0261299038 |
| H | 14.7002297995 | 4.7060697247  | 13.4643649096 |
| C | 15.7922988214 | 6.5028250258  | 13.0983623550 |
| H | 16.6963417703 | 5.9746110296  | 12.7798286475 |
| H | 16.0999838289 | 7.4290974152  | 13.5910405245 |
| H | 15.2178584932 | 6.7664595517  | 12.2057431875 |
| C | 15.7324887603 | 5.1584833105  | 15.2804001360 |
| H | 16.6336440594 | 4.6108040658  | 14.9869914573 |
| H | 15.1151951730 | 4.4982379149  | 15.8965060532 |

|   |               |               |               |
|---|---------------|---------------|---------------|
| H | 16.0403083238 | 6.0076124625  | 15.8962472951 |
| C | 9.5049427719  | 1.5356448945  | 11.4841484683 |
| C | 10.6882902567 | 0.5108049925  | 9.9816711067  |
| C | 11.6577219100 | 0.1383372629  | 9.0414284311  |
| H | 12.4998171156 | 0.7931991261  | 8.8392716236  |
| C | 11.5056753086 | -1.0779623257 | 8.3881291123  |
| H | 12.2424425376 | -1.3927064453 | 7.6544918513  |
| C | 10.4060765018 | -1.9155695298 | 8.6606591906  |
| H | 10.3141440377 | -2.8605021026 | 8.1323253961  |
| C | 9.4328418477  | -1.5638151017 | 9.5907959783  |
| H | 8.5955442705  | -2.2252309418 | 9.7825155955  |
| C | 9.5879781447  | -0.3372560831 | 10.2520159191 |
| C | 7.6055471244  | -0.1416664127 | 11.8499798789 |
| H | 7.3361629723  | 0.6363428806  | 12.5645846752 |
| C | 7.8360824441  | -1.4352410013 | 12.6445784717 |
| H | 6.9201801726  | -1.7126833505 | 13.1763199177 |
| H | 8.6316956547  | -1.2954977384 | 13.3817777340 |
| H | 8.1158703448  | -2.2705503106 | 11.9973805202 |
| C | 6.4604931898  | -0.2535675597 | 10.8328926625 |
| H | 5.5313923110  | -0.5250986584 | 11.3446259412 |
| H | 6.6614328028  | -1.0136797808 | 10.0732741088 |
| H | 6.3052355332  | 0.7018561924  | 10.3233828440 |

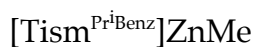

| atom | x            | y             | z             |
|------|--------------|---------------|---------------|
| Zn   | 3.5455907281 | 13.7733655362 | 0.2823311321  |
| N    | 1.3916997648 | 14.2610358675 | -0.5905675201 |

|    |               |               |               |
|----|---------------|---------------|---------------|
| N  | -0.8070028344 | 14.5867138555 | -0.3404869746 |
| N  | 4.5915240948  | 11.7588434392 | -0.4105153474 |
| N  | 4.4972246075  | 9.6146651124  | -1.0403959219 |
| N  | 4.0735210493  | 14.5962379448 | 2.4342912556  |
| N  | 4.5772629137  | 14.2938327272 | 4.5922305245  |
| Si | 0.6672537426  | 13.1128699561 | 1.8544129899  |
| Si | 2.1473074912  | 10.7428078566 | 0.4977998671  |
| Si | 3.2818769130  | 11.9980236254 | 3.1021539028  |
| C  | 4.6585395731  | 15.1116040160 | -0.8624056057 |
| H  | 5.6570005053  | 15.2852965964 | -0.4357896563 |
| H  | 4.1692714626  | 16.0932572952 | -0.9398560597 |
| H  | 4.8095869383  | 14.7482317851 | -1.8891202647 |
| C  | 2.2604136107  | 12.2264085372 | 1.5852042979  |
| C  | -0.8184446579 | 11.9932187781 | 2.3021523177  |
| H  | -1.6993849467 | 12.5471298226 | 2.6467014637  |
| H  | -0.5173901492 | 11.3382543692 | 3.1285442548  |
| H  | -1.1338522659 | 11.3450087549 | 1.4776284924  |
| C  | 0.6716441577  | 14.4980219374 | 3.1614188438  |
| H  | -0.3006822867 | 15.0060781752 | 3.1736853809  |
| H  | 1.4408030090  | 15.2453828062 | 2.9492629906  |
| H  | 0.8463814047  | 14.1161822222 | 4.1735289694  |
| C  | 0.3439239775  | 14.0376203467 | 0.1959839870  |
| C  | 0.9309132646  | 14.9725764801 | -1.6852192780 |
| C  | 1.6224000437  | 15.4502237082 | -2.8063806994 |
| H  | 2.6917221724  | 15.2930885357 | -2.8949583361 |
| C  | 0.8946983370  | 16.1306752785 | -3.7741767880 |
| H  | 1.4018648918  | 16.5148105929 | -4.6547181505 |
| C  | -0.4924041527 | 16.3356749513 | -3.6363867389 |

|   |               |               |               |
|---|---------------|---------------|---------------|
| H | -1.0303655988 | 16.8716051654 | -4.4135617947 |
| C | -1.1930057419 | 15.8695391979 | -2.5287898603 |
| H | -2.2608270271 | 16.0371606275 | -2.4443598094 |
| C | -0.4605014258 | 15.1843014567 | -1.5497460453 |
| C | -2.1353968641 | 14.5844097400 | 0.2950077457  |
| H | -1.9928155734 | 14.0619469368 | 1.2414910923  |
| C | -2.6059713553 | 16.0100099409 | 0.6177787319  |
| H | -3.5486693993 | 15.9724771066 | 1.1735376367  |
| H | -2.7710660468 | 16.6027140326 | -0.2857728312 |
| H | -1.8654208676 | 16.5301323958 | 1.2325740312  |
| C | -3.1537947079 | 13.7845695493 | -0.5297216817 |
| H | -4.1050962606 | 13.7241129121 | 0.0091653371  |
| H | -2.7934882124 | 12.7665129411 | -0.7045538624 |
| H | -3.3464268243 | 14.2466866865 | -1.5018244295 |
| C | 1.7616712795  | 9.1023977040  | 1.4041807349  |
| H | 1.5205533332  | 8.2717523336  | 0.7308224504  |
| H | 0.8793526599  | 9.2592606586  | 2.0362338889  |
| H | 2.5731852814  | 8.7730723656  | 2.0617941156  |
| C | 0.9047855912  | 10.8334072394 | -0.9426237818 |
| H | 0.9852106083  | 9.9346551236  | -1.5667142627 |
| H | 1.0921338667  | 11.7035232252 | -1.5773691468 |
| H | -0.1328341174 | 10.8902447199 | -0.5951460109 |
| C | 3.8643933133  | 10.6469628615 | -0.3709164405 |
| C | 5.7435658645  | 11.4634048765 | -1.1192467021 |
| C | 6.8375083106  | 12.2775115753 | -1.4414105488 |
| H | 6.8500948936  | 13.3187213077 | -1.1384529731 |
| C | 7.8786532093  | 11.7072948939 | -2.1625961918 |
| H | 8.7404735962  | 12.3124750423 | -2.4294153284 |

|   |              |               |               |
|---|--------------|---------------|---------------|
| C | 7.8392405053 | 10.3557310601 | -2.5586801217 |
| H | 8.6717145300 | 9.9420161572  | -3.1212759028 |
| C | 6.7597836047 | 9.5350862184  | -2.2483582892 |
| H | 6.7512487477 | 8.4973170568  | -2.5619495552 |
| C | 5.7069350933 | 10.1087512332 | -1.5223722511 |
| C | 3.9462055678 | 8.2654610312  | -1.2521203227 |
| H | 2.9702675085 | 8.2817557064  | -0.7658256949 |
| C | 3.7167290214 | 7.9797509381  | -2.7433861841 |
| H | 3.2181710060 | 7.0122110011  | -2.8630690269 |
| H | 4.6542618919 | 7.9471230858  | -3.3045436921 |
| H | 3.0819374111 | 8.7507031572  | -3.1901770353 |
| C | 4.7959017626 | 7.1929288474  | -0.5558440146 |
| H | 4.3143246818 | 6.2143305587  | -0.6532057776 |
| H | 4.9032173934 | 7.4177424880  | 0.5094156912  |
| H | 5.7974059390 | 7.1196544087  | -0.9886263311 |
| C | 2.3301499286 | 11.3459204989 | 4.6287074086  |
| H | 2.9805707161 | 11.0413073719 | 5.4568237865  |
| H | 1.7699479428 | 10.4530478545 | 4.3261298980  |
| H | 1.6021122683 | 12.0629081519 | 5.0229120435  |
| C | 4.8136571917 | 10.8779002162 | 2.9416611071  |
| H | 5.3851946204 | 10.8860470025 | 3.8782032372  |
| H | 5.4740229963 | 11.2174033196 | 2.1392641928  |
| H | 4.5481912814 | 9.8346574062  | 2.7372242639  |
| C | 4.0180158415 | 13.7438568576 | 3.4529651556  |
| C | 5.0007987655 | 15.5809601170 | 4.2704987537  |
| C | 5.6135074763 | 16.6041426058 | 5.0067960610  |
| H | 5.8633814698 | 16.4950648441 | 6.0561547695  |
| C | 5.8950543220 | 17.7891915482 | 4.3351570585  |

|   |              |               |              |
|---|--------------|---------------|--------------|
| H | 6.3704308256 | 18.6022687763 | 4.8769164248 |
| C | 5.5802198191 | 17.9599272842 | 2.9726092449 |
| H | 5.8211108879 | 18.9015615644 | 2.4874877898 |
| C | 4.9712921998 | 16.9483808009 | 2.2412590037 |
| H | 4.7317205185 | 17.0624129900 | 1.1897740215 |
| C | 4.6791123358 | 15.7491111250 | 2.9040689099 |
| C | 4.7409473554 | 13.6062764192 | 5.8840427945 |
| H | 4.3259767117 | 12.6103326201 | 5.7259189248 |
| C | 3.9198555762 | 14.2826567647 | 6.9909665977 |
| H | 3.9881505295 | 13.6995703314 | 7.9152799181 |
| H | 2.8662108351 | 14.3478757440 | 6.7038526275 |
| H | 4.2754969827 | 15.2944329328 | 7.2041584102 |
| C | 6.2234914103 | 13.4392380060 | 6.2475973816 |
| H | 6.3162532737 | 12.8419579346 | 7.1606446942 |
| H | 6.7145266370 | 14.4001208453 | 6.4224167091 |
| H | 6.7615031242 | 12.9256383898 | 5.4452323839 |

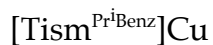

| atom | x             | y             | z             |
|------|---------------|---------------|---------------|
| Cu   | 0.0000000000  | 0.0000000000  | -0.3009274257 |
| Si   | -0.8609484707 | -1.6190936444 | 2.0826040831  |
| N    | -0.0255567286 | -2.0536158436 | -0.5862178328 |
| N    | -0.7495107080 | -4.0196129898 | 0.1796852305  |
| C    | 0.0000000000  | 0.0000000000  | 1.9297532225  |
| C    | -2.7637556939 | -1.5105033081 | 2.1085226092  |
| H    | -3.1321943655 | -1.1000068726 | 3.0543878751  |
| H    | -3.2055590033 | -2.5079937566 | 1.9957894460  |



|    |               |               |               |
|----|---------------|---------------|---------------|
| H  | -3.1422944895 | -0.8886451132 | 1.2913691353  |
| C  | -0.3833915694 | -2.6941920239 | 3.5923877328  |
| H  | -1.1610105985 | -3.4230951902 | 3.8512632543  |
| H  | -0.2500141762 | -2.0448555168 | 4.4652213586  |
| H  | 0.5521707724  | -3.2440108734 | 3.4486022948  |
| C  | -0.5126745637 | -2.6855323085 | 0.4789356859  |
| C  | 0.0711230270  | -2.9728173789 | -1.6112346308 |
| C  | 0.5239339111  | -2.8086764416 | -2.9258859063 |
| H  | 0.8753736393  | -1.8383821323 | -3.2642668780 |
| C  | 0.5090944904  | -3.9187295142 | -3.7611195064 |
| H  | 0.8535347967  | -3.8258409268 | -4.7874028168 |
| C  | 0.0551401844  | -5.1695313222 | -3.2978535185 |
| H  | 0.0563711047  | -6.0187728905 | -3.9757469735 |
| C  | -0.3946453673 | -5.3478635432 | -1.9927895951 |
| H  | -0.7364618341 | -6.3219653350 | -1.6619450876 |
| C  | -0.3828815078 | -4.2284844284 | -1.1482966581 |
| C  | -1.3484912155 | -5.0118666189 | 1.0866845657  |
| H  | -1.5348108968 | -4.4702104615 | 2.0150162680  |
| C  | -0.3682365166 | -6.1515989866 | 1.3971028802  |
| H  | 0.5647427704  | -5.7555396473 | 1.8082544042  |
| H  | -0.1243270148 | -6.7342642306 | 0.5044388374  |
| H  | -0.8072026679 | -6.8320479994 | 2.1339201204  |
| C  | -2.7004607049 | -5.5093177751 | 0.5542685577  |
| H  | -3.3736571741 | -4.6676951962 | 0.3666624216  |
| H  | -3.1707439828 | -6.1691466136 | 1.2904770081  |
| H  | -2.5928982579 | -6.0691517192 | -0.3785935982 |
| Si | -0.9717019918 | 1.5551500692  | 2.0826040831  |
| N  | -1.7657051258 | 1.0489406980  | -0.5862178328 |

|   |               |              |               |
|---|---------------|--------------|---------------|
| N | -3.1063316086 | 2.6589018085 | 0.1796852305  |
| C | 0.0737436096  | 3.1487342948 | 2.1085226092  |
| H | 0.6134632867  | 3.2625633265 | 3.0543878751  |
| H | -0.5692068041 | 4.0300924085 | 1.9957894460  |
| H | 0.8015580018  | 3.1656294106 | 1.2913691353  |
| C | -2.1415429507 | 1.6791228506 | 3.5923877328  |
| H | -2.3839820950 | 2.7170122675 | 3.8512632543  |
| H | -1.6458897366 | 1.2389463863 | 4.4652213586  |
| H | -3.0854812127 | 1.1438115206 | 3.4486022948  |
| C | -2.0694019200 | 1.7867553503 | 0.4789356859  |
| C | -2.6100968844 | 1.4248143413 | -1.6112346308 |
| C | -2.6943521049 | 0.9505981439 | -2.9258859063 |
| H | -2.0297724481 | 0.1610952567 | -3.2642668780 |
| C | -3.6482665551 | 1.5184759955 | -3.7611195064 |
| H | -3.7400428318 | 1.1737376465 | -4.7874028168 |
| C | -4.5045155429 | 2.5370128607 | -3.2978535185 |
| H | -5.2405957751 | 2.9605676365 | -3.9757469735 |
| C | -4.4340630007 | 3.0157046852 | -1.9927895951 |
| H | -5.1067516649 | 3.7987773247 | -1.6619450876 |
| C | -3.4705341806 | 2.4458273266 | -1.1482966581 |
| C | -3.6661582046 | 3.6737609589 | 1.0866845657  |
| H | -3.1039103715 | 3.5642904574 | 2.0150162680  |
| C | -5.1433227380 | 3.3947016712 | 1.3971028802  |
| H | -5.2668149323 | 2.3886882379 | 1.8082544042  |
| H | -5.7698803921 | 3.4748024685 | 0.5044388374  |
| H | -5.5131257934 | 4.1150820161 | 2.1339201204  |
| C | -3.4209787983 | 5.0933264599 | 0.5542685577  |
| H | -2.3555140300 | 5.2555204145 | 0.3666624216  |

|    |               |               |               |
|----|---------------|---------------|---------------|
| H  | -3.7572656956 | 5.8305181448  | 1.2904770081  |
| H  | -3.9595904393 | 5.2800916203  | -0.3785935982 |
| Si | 1.8326504625  | 0.0639435752  | 2.0826040831  |
| N  | 1.7912618545  | 1.0046751456  | -0.5862178328 |
| N  | 3.8558423166  | 1.3607111814  | 0.1796852305  |
| C  | 2.6900120843  | -1.6382309867 | 2.1085226092  |
| H  | 2.5187310788  | -2.1625564538 | 3.0543878751  |
| H  | 3.7747658074  | -1.5220986519 | 1.9957894460  |
| H  | 2.3407364877  | -2.2769842975 | 1.2913691353  |
| C  | 2.5249345201  | 1.0150691733  | 3.5923877328  |
| H  | 3.5449926935  | 0.7060829227  | 3.8512632543  |
| H  | 1.8959039127  | 0.8059091306  | 4.4652213586  |
| H  | 2.5333104403  | 2.1001993528  | 3.4486022948  |
| C  | 2.5820764837  | 0.8987769582  | 0.4789356859  |
| C  | 2.5389738574  | 1.5480030376  | -1.6112346308 |
| C  | 2.1704181939  | 1.8580782977  | -2.9258859063 |
| H  | 1.1543988088  | 1.6772868756  | -3.2642668780 |
| C  | 3.1391720647  | 2.4002535187  | -3.7611195064 |
| H  | 2.8865080352  | 2.6521032803  | -4.7874028168 |
| C  | 4.4493753585  | 2.6325184616  | -3.2978535185 |
| H  | 5.1842246704  | 3.0582052540  | -3.9757469735 |
| C  | 4.8287083680  | 2.3321588580  | -1.9927895951 |
| H  | 5.8432134990  | 2.5231880103  | -1.6619450876 |
| C  | 3.8534156884  | 1.7826571018  | -1.1482966581 |
| C  | 5.0146494201  | 1.3381056600  | 1.0866845657  |
| H  | 4.6387212683  | 0.9059200041  | 2.0150162680  |
| C  | 5.5115592545  | 2.7568973154  | 1.3971028802  |
| H  | 4.7020721619  | 3.3668514094  | 1.8082544042  |

|   |              |               |               |
|---|--------------|---------------|---------------|
| H | 5.8942074069 | 3.2594617621  | 0.5044388374  |
| H | 6.3203284613 | 2.7169659833  | 2.1339201204  |
| C | 6.1214395032 | 0.4159913152  | 0.5542685577  |
| H | 5.7291712040 | -0.5878252183 | 0.3666624216  |
| H | 6.9280096784 | 0.3386284687  | 1.2904770081  |
| H | 6.5524886971 | 0.7890600988  | -0.3785935982 |

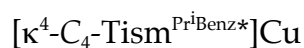

| atom | x            | y             | z             |
|------|--------------|---------------|---------------|
| Cu   | 0.0000000000 | 0.0000000000  | -0.4034690839 |
| Si   | 1.7303448966 | -0.5441133610 | 2.2908545411  |
| N    | 2.6808569520 | -0.0738508346 | 0.7566904387  |
| N    | 2.9365828164 | 0.3679894382  | -1.3804492676 |
| C    | 0.0000000000 | 0.0000000000  | 2.1421419594  |
| C    | 2.7570192394 | 0.2038221556  | 3.7134864035  |
| H    | 3.2008720910 | 1.1720921266  | 3.4636754807  |
| H    | 3.5668701391 | -0.4659644596 | 4.0260986970  |
| H    | 2.1098890652 | 0.3523112665  | 4.5850037882  |
| C    | 1.9998579887 | -2.4196274245 | 2.3713850781  |
| H    | 1.4095296880 | -2.9517374366 | 1.6190560542  |
| H    | 1.7423572160 | -2.8234102513 | 3.3561707698  |
| H    | 3.0568141100 | -2.6474422006 | 2.1888948915  |
| C    | 2.0007925839 | 0.1344565718  | -0.4113409087 |
| C    | 4.0601042200 | 0.0034871238  | 0.5176261610  |
| C    | 5.1707401424 | -0.1618095021 | 1.3499317909  |
| H    | 5.0555194739 | -0.3889574353 | 2.4025543339  |
| C    | 6.4381982873 | -0.0242473973 | 0.7861671899  |

|    |               |               |               |
|----|---------------|---------------|---------------|
| H  | 7.3153867448  | -0.1501229874 | 1.4143683808  |
| C  | 6.6012078573  | 0.2727969532  | -0.5745620277 |
| H  | 7.6015652981  | 0.3753178110  | -0.9852524435 |
| C  | 5.4996728575  | 0.4360810190  | -1.4132709099 |
| H  | 5.6381644857  | 0.6616814040  | -2.4644004647 |
| C  | 4.2285004964  | 0.2933966013  | -0.8507016852 |
| C  | 2.5573891304  | 0.6695760311  | -2.7686997557 |
| H  | 1.4639792069  | 0.6387942211  | -2.7424848098 |
| C  | 2.9849105114  | 2.0863732885  | -3.1752698494 |
| H  | 2.5808139778  | 2.8230417810  | -2.4743067829 |
| H  | 2.6053692608  | 2.3185437291  | -4.1761517990 |
| H  | 4.0727601061  | 2.1997144832  | -3.1963211347 |
| C  | 3.0483659628  | -0.4117055697 | -3.7407967278 |
| H  | 2.6954817252  | -1.3987576419 | -3.4271851687 |
| H  | 4.1398305722  | -0.4476708941 | -3.8030486039 |
| H  | 2.6637189109  | -0.2114139783 | -4.7467227690 |
| Si | -0.3939564551 | 1.7705793183  | 2.2908545411  |
| N  | -1.2764717771 | 2.3586156416  | 0.7566904387  |
| N  | -1.7869796100 | 2.3591606002  | -1.3804492676 |
| C  | -1.5550247843 | 2.2857376222  | 3.7134864035  |
| H  | -2.6154976027 | 2.1859904818  | 3.4636754807  |
| H  | -1.3798980103 | 3.3219823822  | 4.0260986970  |
| H  | -1.3600550394 | 1.6510618963  | 4.5850037882  |
| C  | 1.0955298230  | 2.9417415344  | 2.3713850781  |
| H  | 1.8515147614  | 2.6965572354  | 1.6190560542  |
| H  | 1.5739663949  | 2.9206307372  | 3.3561707698  |
| H  | 0.7643451458  | 3.9709997742  | 2.1888948915  |
| C  | -1.1168390988 | 1.6655089194  | -0.4113409087 |

|    |               |               |               |
|----|---------------|---------------|---------------|
| C  | -2.0330720478 | 3.5144098346  | 0.5176261610  |
| C  | -2.4452389318 | 4.5588970707  | 1.3499317909  |
| H  | -2.1909127170 | 4.5726870113  | 2.4025543339  |
| C  | -3.1981002817 | 5.5877669700  | 0.7861671899  |
| H  | -3.5276830516 | 6.4103722532  | 1.4143683808  |
| C  | -3.5368530202 | 5.5804152235  | -0.5745620277 |
| H  | -4.1258174079 | 6.3954897512  | -0.9852524435 |
| C  | -3.1274936693 | 4.5448158976  | -1.4132709099 |
| H  | -3.3921151479 | 4.5519529733  | -2.4644004647 |
| C  | -2.3683391583 | 3.5152905491  | -0.8507016852 |
| C  | -1.8585644179 | 1.8799759387  | -2.7686997557 |
| H  | -1.2852016268 | 0.9484460733  | -2.7424848098 |
| C  | -3.2993075253 | 1.5418216867  | -3.1752698494 |
| H  | -3.7352328872 | 0.8235295767  | -2.4743067829 |
| H  | -3.3106023996 | 1.0970441015  | -4.1761517990 |
| H  | -3.9413886766 | 2.4272564738  | -3.1963211347 |
| C  | -1.1676354992 | 2.8458151486  | -3.7407967278 |
| H  | -0.1363812110 | 3.0337344704  | -3.4271851687 |
| H  | -1.6822209192 | 3.8090338899  | -3.8030486039 |
| H  | -1.1487695795 | 2.4125552346  | -4.7467227690 |
| Si | -1.3363884415 | -1.2264659573 | 2.2908545411  |
| N  | -1.4043851748 | -2.2847648070 | 0.7566904387  |
| N  | -1.1496032064 | -2.7271500384 | -1.3804492676 |
| C  | -1.2019944551 | -2.4895597778 | 3.7134864035  |
| H  | -0.5853744883 | -3.3580826083 | 3.4636754807  |
| H  | -2.1869721288 | -2.8560179227 | 4.0260986970  |
| H  | -0.7498340257 | -2.0033731628 | 4.5850037882  |
| C  | -3.0953878117 | -0.5221141099 | 2.3713850781  |

|   |               |               |               |
|---|---------------|---------------|---------------|
| H | -3.2610444493 | 0.2551802011  | 1.6190560542  |
| H | -3.3163236110 | -0.0972204859 | 3.3561707698  |
| H | -3.8211592558 | -1.3235575736 | 2.1888948915  |
| C | -0.8839534850 | -1.7999654912 | -0.4113409087 |
| C | -2.0270321722 | -3.5178969584 | 0.5176261610  |
| C | -2.7255012106 | -4.3970875686 | 1.3499317909  |
| H | -2.8646067569 | -4.1837295760 | 2.4025543339  |
| C | -3.2400980057 | -5.5635195728 | 0.7861671899  |
| H | -3.7877036931 | -6.2602492658 | 1.4143683808  |
| C | -3.0643548371 | -5.8532121767 | -0.5745620277 |
| H | -3.4757478902 | -6.7708075622 | -0.9852524435 |
| C | -2.3721791882 | -4.9808969166 | -1.4132709099 |
| H | -2.2460493378 | -5.2136343773 | -2.4644004647 |
| C | -1.8601613381 | -3.8086871504 | -0.8507016852 |
| C | -0.6988247125 | -2.5495519698 | -2.7686997557 |
| H | -0.1787775802 | -1.5872402944 | -2.7424848098 |
| C | 0.3143970139  | -3.6281949752 | -3.1752698494 |
| H | 1.1544189094  | -3.6465713578 | -2.4743067829 |
| H | 0.7052331388  | -3.4155878306 | -4.1761517990 |
| H | -0.1313714295 | -4.6269709570 | -3.1963211347 |
| C | -1.8807304636 | -2.4341095790 | -3.7407967278 |
| H | -2.5591005142 | -1.6349768285 | -3.4271851687 |
| H | -2.4576096529 | -3.3613629958 | -3.8030486039 |
| H | -1.5149493314 | -2.2011412562 | -4.7467227690 |

---

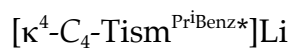

| atom | x            | y             | z             |
|------|--------------|---------------|---------------|
| Li   | 0.0000000000 | 0.0000000000  | -0.3300570047 |
| Si   | 1.7260091104 | -0.5420331653 | 2.1777926781  |
| N    | 2.7197547625 | -0.0646429335 | 0.6785080933  |
| N    | 3.0607493550 | 0.5018115247  | -1.4087789279 |
| C    | 0.0000000000 | 0.0000000000  | 1.9768074541  |
| C    | 2.7133684221 | 0.2060347425  | 3.6275575109  |
| H    | 3.1640878760 | 1.1724929300  | 3.3838388567  |
| H    | 3.5153587489 | -0.4623970567 | 3.9611455400  |
| H    | 2.0468080381 | 0.3576428507  | 4.4835202962  |
| C    | 2.0031385539 | -2.4156696156 | 2.2643789525  |
| H    | 1.4196110993 | -2.9542335250 | 1.5117887583  |
| H    | 1.7444938336 | -2.8166748516 | 3.2496151973  |
| H    | 3.0617890457 | -2.6381378888 | 2.0866286367  |
| C    | 2.0819479705 | 0.2495357360  | -0.4896955163 |
| C    | 4.1099318493 | -0.0368719769 | 0.4872773870  |
| C    | 5.1852671270 | -0.3079308473 | 1.3391414662  |
| H    | 5.0255587401 | -0.5990133081 | 2.3698366526  |
| C    | 6.4751117922 | -0.1916395768 | 0.8249254605  |
| H    | 7.3255705166 | -0.3981398909 | 1.4677592284  |
| C    | 6.6928665019 | 0.1879860388  | -0.5085685679 |
| H    | 7.7089801815 | 0.2724687055  | -0.8827413202 |
| C    | 5.6275681678 | 0.4564168058  | -1.3657963085 |
| H    | 5.8098006221 | 0.7451934143  | -2.3944557434 |
| C    | 4.3328940280 | 0.3346902570  | -0.8523761782 |
| C    | 2.7348034954 | 0.8983316656  | -2.7873192790 |



|    |               |               |               |
|----|---------------|---------------|---------------|
| H  | 1.6413157221  | 0.9145460262  | -2.7939070510 |
| C  | 3.2327103910  | 2.3151179650  | -3.1036766780 |
| H  | 2.8473328322  | 3.0288358868  | -2.3696972366 |
| H  | 2.8845539717  | 2.6198424213  | -4.0962086616 |
| H  | 4.3246082337  | 2.3792824269  | -3.0992016461 |
| C  | 3.2062857389  | -0.1465632751 | -3.8075800432 |
| H  | 2.8073976522  | -1.1341007844 | -3.5572693827 |
| H  | 4.2964724692  | -0.2231340493 | -3.8465146175 |
| H  | 2.8546785550  | 0.1237058786  | -4.8088569067 |
| Si | -0.3935900644 | 1.7657843194  | 2.1777926781  |
| N  | -1.3038949587 | 2.3876981832  | 0.6785080933  |
| N  | -1.9649562058 | 2.3997809337  | -1.4087789279 |
| C  | -1.5351155322 | 2.2468286121  | 3.6275575109  |
| H  | -2.5974526012 | 2.1539340155  | 3.3838388567  |
| H  | -1.3572317768 | 3.2755885083  | 3.9611455400  |
| H  | -1.3331318132 | 1.5937663324  | 4.4835202962  |
| C  | 1.0904619773  | 2.9426036827  | 2.2643789525  |
| H  | 1.8486357317  | 2.7065360380  | 1.5117887583  |
| H  | 1.5670650589  | 2.9191134024  | 3.2496151973  |
| H  | 0.7537999076  | 3.9706560390  | 2.0866286367  |
| C  | -1.2570782718 | 1.6782519638  | -0.4896955163 |
| C  | -2.0230338560 | 3.5777413778  | 0.4872773870  |
| C  | -2.3259576271 | 4.6445384810  | 1.3391414662  |
| H  | -1.9940186280 | 4.6517681912  | 2.3698366526  |
| C  | -3.0715911542 | 5.7034310928  | 0.8249254605  |
| H  | -3.3179859985 | 6.5432001100  | 1.4677592284  |
| C  | -3.5092339361 | 5.7021993954  | -0.5085685679 |
| H  | -4.0904549114 | 6.5399383217  | -0.8827413202 |

|    |               |               |               |
|----|---------------|---------------|---------------|
| C  | -3.2090526325 | 4.6454085919  | -1.3657963085 |
| H  | -3.5502567386 | 4.6588382225  | -2.3944557434 |
| C  | -2.4562972790 | 3.5850511717  | -0.8523761782 |
| C  | -2.1453797912 | 1.9192434686  | -2.7873192790 |
| H  | -1.6126779527 | 0.9641480979  | -2.7939070510 |
| C  | -3.6213061660 | 1.6420503392  | -3.1036766780 |
| H  | -4.0467152380 | 0.9514446223  | -2.3696972366 |
| H  | -3.7111270766 | 1.1881758074  | -4.0962086616 |
| H  | -4.2228231413 | 2.5555793783  | -3.0992016461 |
| C  | -1.4762153500 | 2.8500065393  | -3.8075800432 |
| H  | -0.4215387364 | 2.9983280775  | -3.5572693827 |
| H  | -1.9549964795 | 3.8324213296  | -3.8465146175 |
| H  | -1.5344717110 | 2.4103712090  | -4.8088569067 |
| Si | -1.3324190460 | -1.2237511542 | 2.1777926781  |
| N  | -1.4158598038 | -2.3230552497 | 0.6785080933  |
| N  | -1.0957931492 | -2.9015924584 | -1.4087789279 |
| C  | -1.1782528900 | -2.4528633547 | 3.6275575109  |
| H  | -0.5666352749 | -3.3264269455 | 3.3838388567  |
| H  | -2.1581269722 | -2.8131914517 | 3.9611455400  |
| H  | -0.7136762249 | -1.9514091830 | 4.4835202962  |
| C  | -3.0936005312 | -0.5269340672 | 2.2643789525  |
| H  | -3.2682468310 | 0.2476974870  | 1.5117887583  |
| H  | -3.3115588925 | -0.1024385509 | 3.2496151973  |
| H  | -3.8155889533 | -1.3325181502 | 2.0866286367  |
| C  | -0.8248696987 | -1.9277876999 | -0.4896955163 |
| C  | -2.0868979933 | -3.5408694009 | 0.4872773870  |
| C  | -2.8593094999 | -4.3366076337 | 1.3391414662  |
| H  | -3.0315401121 | -4.0527548831 | 2.3698366526  |

|   |               |               |               |
|---|---------------|---------------|---------------|
| C | -3.4035206380 | -5.5117915160 | 0.8249254605  |
| H | -4.0075845181 | -6.1450602191 | 1.4677592284  |
| C | -3.1836325658 | -5.8901854341 | -0.5085685679 |
| H | -3.6185252701 | -6.8124070272 | -0.8827413202 |
| C | -2.4185155353 | -5.1018253978 | -1.3657963085 |
| H | -2.2595438835 | -5.4040316368 | -2.3944557434 |
| C | -1.8765967491 | -3.9197414287 | -0.8523761782 |
| C | -0.5894237042 | -2.8175751342 | -2.7873192790 |
| H | -0.0286377694 | -1.8786941241 | -2.7939070510 |
| C | 0.3885957750  | -3.9571683042 | -3.1036766780 |
| H | 1.1993824058  | -3.9802805092 | -2.3696972366 |
| H | 0.8265731049  | -3.8080182287 | -4.0962086616 |
| H | -0.1017850924 | -4.9348618052 | -3.0992016461 |
| C | -1.7300703890 | -2.7034432641 | -3.8075800432 |
| H | -2.3858589158 | -1.8642272931 | -3.5572693827 |
| H | -2.3414759897 | -3.6092872803 | -3.8465146175 |
| H | -1.3202068440 | -2.5340770876 | -4.8088569067 |

---

[Tism<sup>Pr<sup>i</sup>Benz\*</sup>]<sup>-</sup> (3:0 conformation)

---

| atom | x             | y            | z             |
|------|---------------|--------------|---------------|
| Si   | 1.7475084390  | 0.2267462312 | 2.2881051725  |
| N    | 2.5348108784  | 0.8287795370 | 0.6889447303  |
| N    | 3.2906358706  | 2.3291848572 | -0.7102519840 |
| C    | -0.0501606390 | 0.0345754568 | 2.2611283268  |
| C    | 2.4868881543  | 1.4845439550 | 3.5113629447  |
| H    | 2.2365367229  | 2.5170275498 | 3.2671906870  |
| H    | 3.5809143385  | 1.3980926715 | 3.5101437695  |

|    |               |               |               |
|----|---------------|---------------|---------------|
| H  | 2.1331614549  | 1.2676656930  | 4.5265906481  |
| C  | 2.7314649568  | -1.3546263285 | 2.6802888026  |
| H  | 2.3882598622  | -2.2514844746 | 2.1560977179  |
| H  | 2.6361663321  | -1.5451187906 | 3.7559007214  |
| H  | 3.7972022200  | -1.2070905840 | 2.4693300291  |
| C  | 2.5108658538  | 2.1702041833  | 0.4153713501  |
| C  | 3.3012923206  | 0.1452561901  | -0.2651577025 |
| C  | 3.5925883990  | -1.2099903274 | -0.4562850404 |
| H  | 3.1628576306  | -1.9720748464 | 0.1809484586  |
| C  | 4.4356098096  | -1.5583134367 | -1.5115754967 |
| H  | 4.6855508104  | -2.6045630615 | -1.6663899630 |
| C  | 4.9668345780  | -0.5890847292 | -2.3752649422 |
| H  | 5.6216770703  | -0.8926714135 | -3.1881892824 |
| C  | 4.6563225490  | 0.7601482709  | -2.2128828899 |
| H  | 5.0616683135  | 1.5018195364  | -2.8922318432 |
| C  | 3.8117049870  | 1.1136334672  | -1.1558102635 |
| C  | 3.5484138626  | 3.6599575009  | -1.2660065634 |
| H  | 2.8918824743  | 4.3053576145  | -0.6755598654 |
| C  | 5.0015150020  | 4.0956819334  | -1.0245106139 |
| H  | 5.2343875545  | 4.0586869686  | 0.0435726375  |
| H  | 5.1575916608  | 5.1210993839  | -1.3785971977 |
| H  | 5.7090105162  | 3.4456283754  | -1.5494274186 |
| C  | 3.1419598128  | 3.7720204180  | -2.7426488212 |
| H  | 2.1315939740  | 3.3840006727  | -2.8931491861 |
| H  | 3.8153430391  | 3.2175842655  | -3.4026182455 |
| H  | 3.1610984231  | 4.8217745901  | -3.0560304063 |
| Si | -1.1515140234 | 1.4683285028  | 2.4008134227  |
| N  | -2.2925194450 | 1.7198675608  | 0.9413201191  |

|   |               |               |               |
|---|---------------|---------------|---------------|
| N | -4.1531417274 | 1.7476123065  | -0.2015622213 |
| C | -2.3859858394 | 1.4448155290  | 3.8451913517  |
| H | -3.0547858484 | 0.5831062469  | 3.8210333712  |
| H | -3.0087434980 | 2.3466815446  | 3.8471069218  |
| H | -1.8166386785 | 1.4162794956  | 4.7830483890  |
| C | -0.3153896895 | 3.1715917140  | 2.5356177017  |
| H | 0.5484881303  | 3.2919714982  | 1.8758932507  |
| H | 0.0236295563  | 3.3284701997  | 3.5660180167  |
| H | -1.0458471088 | 3.9571881964  | 2.3073589630  |
| C | -3.6142247180 | 1.3658969936  | 1.0100848057  |
| C | -2.0001014468 | 2.3148419604  | -0.2949640938 |
| C | -0.8160883997 | 2.8269425183  | -0.8343067871 |
| H | 0.1217967393  | 2.7807531322  | -0.2884924361 |
| C | -0.8732573226 | 3.3850087129  | -2.1117701351 |
| H | 0.0284063241  | 3.8024786934  | -2.5500054368 |
| C | -2.0704982455 | 3.4223620258  | -2.8423732938 |
| H | -2.0796048128 | 3.8608449877  | -3.8373206591 |
| C | -3.2511478120 | 2.8991089691  | -2.3154424739 |
| H | -4.1700158044 | 2.9260827661  | -2.8915436968 |
| C | -3.2012535901 | 2.3448882364  | -1.0323868605 |
| C | -5.5753177518 | 1.5408861309  | -0.4804937126 |
| H | -5.9328708958 | 1.0480263670  | 0.4282717773  |
| C | -6.3234121788 | 2.8733142522  | -0.6353761035 |
| H | -6.1666391306 | 3.4989817281  | 0.2482282315  |
| H | -7.3989855069 | 2.6953754618  | -0.7472195745 |
| H | -5.9823754891 | 3.4337268533  | -1.5112444731 |
| C | -5.8017356847 | 0.5913932150  | -1.6658682828 |
| H | -5.2771781013 | -0.3542283261 | -1.5010753360 |

|    |               |               |               |
|----|---------------|---------------|---------------|
| H  | -5.4449299936 | 1.0184790483  | -2.6084462557 |
| H  | -6.8706303423 | 0.3771904730  | -1.7790630977 |
| Si | -0.7565410939 | -1.6375301196 | 2.2364543534  |
| N  | -0.3584712957 | -2.5850544038 | 0.6813883311  |
| N  | 0.5432204614  | -4.0827190865 | -0.6258354870 |
| C  | -0.2142072356 | -2.8665271811 | 3.5832953427  |
| H  | 0.8433468638  | -3.1259794888 | 3.5501752823  |
| H  | -0.7860664724 | -3.7974108767 | 3.4892558923  |
| H  | -0.4378693818 | -2.4283091301 | 4.5642517675  |
| C  | -2.6565769210 | -1.7609361645 | 2.3214490019  |
| H  | -3.2110005453 | -0.9470200761 | 1.8450720628  |
| H  | -2.9552521992 | -1.7800539209 | 3.3770505570  |
| H  | -2.9799169551 | -2.7113402021 | 1.8793122681  |
| C  | 0.6033273144  | -3.5604131884 | 0.6512332703  |
| C  | -0.9986792953 | -2.4773921154 | -0.5601727154 |
| C  | -1.9976503793 | -1.6189076420 | -1.0277181918 |
| H  | -2.4102608818 | -0.8444920965 | -0.3923721153 |
| C  | -2.4340880288 | -1.7775200458 | -2.3431370995 |
| H  | -3.1964385969 | -1.1101574552 | -2.7344506387 |
| C  | -1.8904855273 | -2.7699842925 | -3.1733191330 |
| H  | -2.2504113890 | -2.8723069118 | -4.1941839717 |
| C  | -0.8841232605 | -3.6218174595 | -2.7167598488 |
| H  | -0.4664780560 | -4.3784155565 | -3.3723408626 |
| C  | -0.4350379424 | -3.4557512202 | -1.4026322345 |
| C  | 1.4040192206  | -5.2010776329 | -1.0163685945 |
| H  | 2.0544643161  | -5.3246696812 | -0.1454203933 |
| C  | 0.5959993751  | -6.4938944382 | -1.2054758033 |
| H  | 0.0307885468  | -6.7228826195 | -0.2973008128 |

|   |               |               |               |
|---|---------------|---------------|---------------|
| H | 1.2645528952  | -7.3357522337 | -1.4197390596 |
| H | -0.1137737858 | -6.4071454592 | -2.0345060135 |
| C | 2.2789424765  | -4.8735272290 | -2.2348724452 |
| H | 2.7923576955  | -3.9193612758 | -2.0933635140 |
| H | 1.6949759307  | -4.8051810760 | -3.1574185004 |
| H | 3.0314773214  | -5.6578567833 | -2.3762757695 |

---

[Tism<sup>Pr<sup>i</sup>Benz</sup>]H (2:1 conformation)

---

| atom | x             | y             | z            |
|------|---------------|---------------|--------------|
| Si   | 2.4992053623  | 6.4131182842  | 6.8109258331 |
| Si   | 2.9561294137  | 9.0623774273  | 5.0639236784 |
| Si   | 0.6026938640  | 7.0361071059  | 4.2865119266 |
| N    | 5.3980511549  | 5.7045263765  | 6.6733554535 |
| C    | 2.3174064522  | 7.2760071730  | 5.1112935391 |
| H    | 3.0136728505  | 6.7625596559  | 4.4305455245 |
| N    | 3.8757321622  | 10.5242296864 | 2.6305251268 |
| N    | 1.0461158216  | 4.6088233923  | 2.6047975866 |
| N    | 3.8028912727  | 8.2799514943  | 2.4822086405 |
| N    | -0.5159678270 | 4.4692143183  | 4.2247910951 |
| N    | 4.7148407866  | 6.8826511461  | 8.4695144228 |
| C    | 6.5232175247  | 5.8894987445  | 7.4660645689 |
| C    | 5.3221347403  | 4.9436536136  | 5.4158826822 |
| H    | 4.2780324643  | 5.0154014625  | 5.1006452822 |
| C    | 0.3996047093  | 5.2446596805  | 3.6649260672 |
| C    | 4.3670070474  | 10.2042863978 | 1.3715925464 |
| C    | 1.8425176231  | 4.6384383391  | 6.7966616937 |
| H    | 2.3489677888  | 4.0053501113  | 6.0606988158 |

|   |               |               |               |
|---|---------------|---------------|---------------|
| H | 0.7734862068  | 4.5885347625  | 6.5703996600  |
| H | 2.0076874889  | 4.1936110584  | 7.7846367467  |
| C | 4.3349012410  | 6.3252165553  | 7.3305808826  |
| C | -0.4886763562 | 3.2805474243  | 3.5224793731  |
| C | 7.8647576131  | 5.5002996517  | 7.3450149706  |
| H | 8.2298934991  | 4.9280221714  | 6.4998550949  |
| C | 0.4816901472  | 3.3454862299  | 2.4921216610  |
| C | 0.2983312297  | 8.1665134296  | 2.7915521092  |
| H | 1.0979668770  | 8.1255449801  | 2.0491017609  |
| H | 0.1779864053  | 9.2129480248  | 3.0898618163  |
| H | -0.6369966860 | 7.8583013077  | 2.3098535248  |
| C | 4.3158975246  | 8.7912740098  | 1.3041567590  |
| C | 6.0681359497  | 6.6316580334  | 8.5838057619  |
| C | 3.5455072361  | 9.3265411689  | 3.2572005843  |
| C | 1.6583785814  | 7.3788761790  | 8.1951707679  |
| H | 2.0658073990  | 8.3887476613  | 8.2968995828  |
| H | 1.8340502857  | 6.8716474490  | 9.1482210638  |
| H | 0.5783779630  | 7.4515810272  | 8.0353432750  |
| C | 4.4897549769  | 9.4009194350  | 6.1207194541  |
| H | 5.3307942501  | 8.7645716631  | 5.8283588446  |
| H | 4.3132356053  | 9.2341380084  | 7.1868163456  |
| H | 4.8029723012  | 10.4438534875 | 5.9886419402  |
| C | 8.7319546809  | 5.8779179116  | 8.3647491935  |
| H | 9.7781373758  | 5.5923961137  | 8.2994151426  |
| C | 8.2883623055  | 6.6191840004  | 9.4783541410  |
| H | 9.0017644897  | 6.8917712004  | 10.2506907497 |
| C | 5.6338622318  | 3.4567973124  | 5.6431690328  |
| H | 5.4740694730  | 2.8957739841  | 4.7167508409  |



|   |               |               |               |
|---|---------------|---------------|---------------|
| H | 4.9808671808  | 3.0391512003  | 6.4148209499  |
| H | 6.6700639451  | 3.3021123818  | 5.9554216581  |
| C | -0.8256365127 | 7.3026006115  | 5.4892642931  |
| H | -0.8471391755 | 6.5469631588  | 6.2777414219  |
| H | -1.7726061801 | 7.2233255183  | 4.9466699998  |
| H | -0.7802100366 | 8.2943009773  | 5.9513416163  |
| C | 5.2644909902  | 10.2878035590 | -0.8358526104 |
| H | 5.6374775644  | 10.8534590684 | -1.6847150842 |
| C | 4.7531411798  | 8.1220574837  | 0.1529282952  |
| H | 4.7258550760  | 7.0378912092  | 0.1063938236  |
| C | 1.6150252382  | 10.2959732418 | 5.6028103769  |
| H | 0.8361627757  | 10.4518739187 | 4.8510947902  |
| H | 2.0337368516  | 11.2741308261 | 5.8610927554  |
| H | 1.1270306433  | 9.9146448216  | 6.5062520089  |
| C | 0.6928567563  | 2.2676553612  | 1.6203684731  |
| H | 1.4209420627  | 2.3037138238  | 0.8183428025  |
| C | 6.1844664953  | 5.5770579012  | 4.3140836304  |
| H | 6.1034763006  | 4.9883416595  | 3.3953347977  |
| H | 7.2393717446  | 5.6149154949  | 4.5966802011  |
| H | 5.8495393895  | 6.5932889689  | 4.0892487547  |
| C | -1.2582202395 | 2.1228702357  | 3.7020665315  |
| H | -1.9986315674 | 2.0813898510  | 4.4947874796  |
| C | 4.8400206549  | 10.9715548895 | 0.2981492121  |
| H | 4.8801951594  | 12.0541863659 | 0.3324070140  |
| C | 2.0979854195  | 5.1871847287  | 1.7517226484  |
| H | 2.3419217995  | 6.1597692281  | 2.1863010935  |
| C | 3.7611100622  | 11.8677490505 | 3.2214225899  |
| H | 3.3709731701  | 11.7017828474 | 4.2268068674  |

|   |               |               |               |
|---|---------------|---------------|---------------|
| C | -0.0819580874 | 1.1294310522  | 1.8147875203  |
| H | 0.0574703262  | 0.2778012026  | 1.1548142777  |
| C | 6.9590842915  | 7.0015812876  | 9.6006658381  |
| H | 6.6024377801  | 7.5701438980  | 10.4537503379 |
| C | -1.0438301165 | 1.0539764305  | 2.8423279543  |
| H | -1.6260320634 | 0.1441896442  | 2.9568223420  |
| C | 3.3823549964  | 4.3473092282  | 1.7920247027  |
| H | 4.1910771393  | 4.8893973722  | 1.2926883980  |
| H | 3.2650965204  | 3.3821239726  | 1.2934165554  |
| H | 3.6863655578  | 4.1580715008  | 2.8251780402  |
| C | 2.7396681476  | 12.7305572567 | 2.4672639824  |
| H | 2.6064118436  | 13.6867256795 | 2.9832505524  |
| H | 1.7696386438  | 12.2274114046 | 2.4207629855  |
| H | 3.0605953608  | 12.9421908433 | 1.4439572679  |
| C | 5.2243892124  | 8.8815124706  | -0.9094617980 |
| H | 5.5699063266  | 8.3882757758  | -1.8132179013 |
| C | 1.5920090386  | 5.4204079936  | 0.3205807976  |
| H | 2.3591597009  | 5.9332547370  | -0.2679677658 |
| H | 0.6944589622  | 6.0450513563  | 0.3257823860  |
| H | 1.3480357095  | 4.4795601160  | -0.1817667204 |
| C | 5.1336927819  | 12.5410913714 | 3.3639098281  |
| H | 5.0270153536  | 13.4905016969 | 3.8981644630  |
| H | 5.5899647292  | 12.7510904908 | 2.3932754242  |
| H | 5.8196928225  | 11.9040251086 | 3.9295611196  |

---

---

 $[\text{Tism}^{\text{PriBenz*}}]\text{H}$  (2:1 conformation)

---

| atom | x            | y             | z             |
|------|--------------|---------------|---------------|
| Si   | 1.9735187717 | -0.5074003334 | 1.6939074936  |
| N    | 2.7934941235 | 0.1519875490  | 0.2146471676  |
| N    | 2.9299825587 | 0.6746356213  | -1.8966685532 |
| C    | 0.1907349251 | 0.1102071349  | 1.6518418216  |
| C    | 2.8868628729 | 0.0774467898  | 3.2427558724  |
| H    | 3.1177454630 | 1.1469678577  | 3.2292320424  |
| H    | 3.8208011823 | -0.4701161111 | 3.4035093414  |
| H    | 2.2496706807 | -0.1024279644 | 4.1155977507  |
| C    | 2.2089555983 | -2.3707858724 | 1.5184550351  |
| H    | 1.6714048069 | -2.7539549394 | 0.6471882625  |
| H    | 1.8814801535 | -2.9412310541 | 2.3917830406  |
| H    | 3.2758815679 | -2.5759225850 | 1.3698083507  |
| C    | 2.0289523732 | 0.3983078550  | -0.9071936298 |
| C    | 4.1643333363 | 0.2588364123  | -0.0811104056 |
| C    | 5.3159253376 | 0.0915010586  | 0.6926288741  |
| H    | 5.2574717550 | -0.1698448554 | 1.7425691068  |
| C    | 6.5528328804 | 0.2770660678  | 0.0759409602  |
| H    | 7.4621273430 | 0.1529592681  | 0.6564367540  |
| C    | 6.6394317257 | 0.6235223858  | -1.2804156502 |
| H    | 7.6154122603 | 0.7634873383  | -1.7359051963 |
| C    | 5.4942427384 | 0.7915669155  | -2.0581896024 |
| H    | 5.5764985276 | 1.0579731409  | -3.1055344305 |
| C    | 4.2535563743 | 0.6021108888  | -1.4430925782 |
| C    | 2.4668905837 | 0.9888168587  | -3.2576669087 |

|    |               |               |               |
|----|---------------|---------------|---------------|
| H  | 1.3791428646  | 0.9354700472  | -3.1617189707 |
| C  | 2.8478136638  | 2.4149402312  | -3.6758338120 |
| H  | 2.4879731880  | 3.1393882271  | -2.9393010258 |
| H  | 2.3921638524  | 2.6538897061  | -4.6422990471 |
| H  | 3.9297778159  | 2.5419759495  | -3.7767492851 |
| C  | 2.9156901269  | -0.0747627218 | -4.2684450082 |
| H  | 2.5983556848  | -1.0695063064 | -3.9418918256 |
| H  | 4.0019535153  | -0.0902647447 | -4.3981254957 |
| H  | 2.4651798019  | 0.1256959263  | -5.2460255825 |
| Si | 0.0008506786  | 1.9551859675  | 2.0121859878  |
| N  | 0.1342787371  | 2.2683570415  | 3.7956983706  |
| N  | -0.5601324226 | 2.0230349778  | 5.8476859697  |
| C  | 1.3053303582  | 2.9947732663  | 1.1285786949  |
| H  | 2.3337928545  | 2.8116706679  | 1.4511993931  |
| H  | 1.0874543608  | 4.0624589344  | 1.2382510890  |
| H  | 1.2569238291  | 2.7450449203  | 0.0640007796  |
| C  | -1.6672088692 | 2.6278366698  | 1.4511412621  |
| H  | -2.4977146424 | 2.2254477931  | 2.0334197379  |
| H  | -1.8391483870 | 2.3839841421  | 0.3965998055  |
| H  | -1.6803351966 | 3.7193489358  | 1.5500067637  |
| C  | -0.7171610905 | 1.5309073726  | 4.5847118410  |
| C  | 0.8208661554  | 3.2272000119  | 4.5634036623  |
| C  | 1.7779396439  | 4.1955241615  | 4.2472365727  |
| H  | 2.1342307943  | 4.3280113219  | 3.2340320138  |
| C  | 2.2663545563  | 4.9941796327  | 5.2799245567  |
| H  | 3.0103004767  | 5.7533865997  | 5.0568058214  |
| C  | 1.8158161160  | 4.8352141715  | 6.5981450372  |
| H  | 2.2145297815  | 5.4731182943  | 7.3813967533  |

|    |               |               |               |
|----|---------------|---------------|---------------|
| C  | 0.8640904913  | 3.8701234771  | 6.9216422283  |
| H  | 0.5239089349  | 3.7554895024  | 7.9440590873  |
| C  | 0.3726962069  | 3.0673982360  | 5.8883712500  |
| C  | -1.3396169192 | 1.4817022684  | 6.9728770344  |
| H  | -1.9371769031 | 0.6952929594  | 6.5043837140  |
| C  | -0.4385595425 | 0.8361678524  | 8.0337723167  |
| H  | 0.2091502517  | 0.0806579555  | 7.5792744929  |
| H  | -1.0536098318 | 0.3464187354  | 8.7954964142  |
| H  | 0.1975209711  | 1.5687721952  | 8.5388365415  |
| C  | -2.2978421481 | 2.5313354237  | 7.5512898874  |
| H  | -2.9370420008 | 2.9397003890  | 6.7630440738  |
| H  | -1.7649080222 | 3.3626533085  | 8.0219196204  |
| H  | -2.9393596532 | 2.0721266079  | 8.3102435442  |
| Si | -1.0823154891 | -1.1090015740 | 2.3633088451  |
| N  | -1.2057855978 | -2.4100829681 | 1.0992199276  |
| N  | -1.6436117255 | -3.0537294150 | -0.9352431188 |
| C  | -0.5623260889 | -1.8975342680 | 3.9969712659  |
| H  | 0.3955928853  | -2.4230945875 | 3.9650543374  |
| H  | -1.3263421969 | -2.5959473024 | 4.3546393785  |
| H  | -0.4888913488 | -1.0833126428 | 4.7234030432  |
| C  | -2.8438406744 | -0.4765794028 | 2.5332842711  |
| H  | -3.2128198761 | -0.0745751223 | 1.5863113639  |
| H  | -2.8999529570 | 0.2851706472  | 3.3134510506  |
| H  | -3.4917769501 | -1.3157103026 | 2.8137071220  |
| C  | -1.5350482778 | -1.9392641122 | -0.1524308267 |
| C  | -1.1214601428 | -3.8111224084 | 1.1044168104  |
| C  | -0.8319728171 | -4.7445244194 | 2.1034100210  |
| H  | -0.6213067555 | -4.4337079800 | 3.1190333468  |

|   |               |               |               |
|---|---------------|---------------|---------------|
| C | -0.8212563664 | -6.0952985208 | 1.7572880646  |
| H | -0.5986935849 | -6.8382090614 | 2.5175298588  |
| C | -1.0913829717 | -6.5084139422 | 0.4445445832  |
| H | -1.0744610717 | -7.5668985551 | 0.2015213663  |
| C | -1.3826483918 | -5.5832846378 | -0.5575601061 |
| H | -1.5893013237 | -5.9160452582 | -1.5682483302 |
| C | -1.3971584707 | -4.2288504305 | -0.2128935997 |
| C | -1.9592909568 | -2.9305331153 | -2.3661974253 |
| H | -2.0789744926 | -1.8515750318 | -2.4956798151 |
| C | -0.7886828671 | -3.3939393182 | -3.2433909307 |
| H | 0.1226976479  | -2.8522219534 | -2.9731685362 |
| H | -1.0086334185 | -3.1952071993 | -4.2975519571 |
| H | -0.5930323804 | -4.4654862917 | -3.1386500651 |
| C | -3.2878428639 | -3.6112458066 | -2.7198336108 |
| H | -4.0919468240 | -3.2340419017 | -2.0811452466 |
| H | -3.2416916053 | -4.6979420521 | -2.6021269853 |
| H | -3.5490410991 | -3.3994189583 | -3.7618433835 |
| H | -0.0427079496 | 0.0651688377  | 0.5717874778  |

---

[Tism<sup>PriBenz</sup>]H (3:0 conformation)

---

| atom | x             | y             | z             |
|------|---------------|---------------|---------------|
| H    | 0.0000000000  | 0.0000000000  | 0.2492599499  |
| Si   | -0.8660655078 | -1.6402640951 | 1.7371057533  |
| N    | 0.5074819998  | -2.3843788808 | -0.6073603085 |
| N    | -0.6582214667 | -4.1568534953 | 0.1448361216  |
| C    | 0.0000000000  | 0.0000000000  | 1.3516772421  |
| C    | -2.7599770773 | -1.5980294468 | 1.6342288506  |

|   |               |               |               |
|---|---------------|---------------|---------------|
| H | -3.1948090419 | -0.8728425169 | 2.3287128117  |
| H | -3.1874798067 | -2.5751757463 | 1.8848270247  |
| H | -3.0759675532 | -1.3201159804 | 0.6269906115  |
| C | -0.4425040187 | -2.2875922915 | 3.4758719919  |
| H | -0.9704114393 | -3.2197987698 | 3.7052008193  |
| H | -0.7613605611 | -1.5492271163 | 4.2214848797  |
| H | 0.6251285293  | -2.4678723378 | 3.6277731508  |
| C | -0.2765339724 | -2.8309192608 | 0.3595564690  |
| C | 0.6545988872  | -3.4273393465 | -1.4983007423 |
| C | 1.3779630104  | -3.4743555120 | -2.6976729255 |
| H | 1.9264119667  | -2.5996415855 | -3.0325921746 |
| C | 1.3569454482  | -4.6544731609 | -3.4291493767 |
| H | 1.9042234723  | -4.7204774878 | -4.3648899886 |
| C | 0.6280101317  | -5.7738092270 | -2.9776301997 |
| H | 0.6264730661  | -6.6818224760 | -3.5743019675 |
| C | -0.0950592500 | -5.7478120873 | -1.7890017645 |
| H | -0.6508467955 | -6.6214721555 | -1.4670802812 |
| C | -0.0731011434 | -4.5565746111 | -1.0498107218 |
| C | -1.5410649747 | -4.9529330424 | 1.0095671002  |
| H | -1.7779346705 | -4.3002705585 | 1.8524337668  |
| C | -0.8221338502 | -6.1857140891 | 1.5755930181  |
| H | 0.0940501710  | -5.8919784190 | 2.0958849238  |
| H | -0.5527772098 | -6.8977529941 | 0.7913682495  |
| H | -1.4737473705 | -6.7010533704 | 2.2888351533  |
| C | -2.8597529540 | -5.2978362829 | 0.3022030632  |
| H | -3.3564958736 | -4.3889737615 | -0.0483296423 |
| H | -3.5333645492 | -5.8145054277 | 0.9938394083  |
| H | -2.6974732474 | -5.9489033954 | -0.5607898593 |

|    |               |               |               |
|----|---------------|---------------|---------------|
| Si | -0.9874776213 | 1.5701667786  | 1.7371057533  |
| N  | -2.3186736829 | 0.7526971367  | -0.6073603085 |
| N  | -3.2708299934 | 2.6484632591  | 0.1448361216  |
| C  | -0.0039455582 | 3.1892249862  | 1.6342288506  |
| H  | 0.8415007278  | 3.2032070490  | 2.3287128117  |
| H  | -0.6364277122 | 4.0480263598  | 1.8848270247  |
| H  | 0.3947298016  | 3.3239240325  | 0.6269906115  |
| C  | -1.7598610286 | 1.5270158673  | 3.4758719919  |
| H  | -2.3032218101 | 2.4503003434  | 3.7052008193  |
| H  | -0.9609897584 | 1.4339711455  | 4.2214848797  |
| H  | -2.4498044025 | 0.6925589819  | 3.6277731508  |
| C  | -2.3133810097 | 1.6549450755  | 0.3595564690  |
| C  | -3.2954623851 | 1.1467704077  | -1.4983007423 |
| C  | -3.6978616404 | 0.5438267835  | -2.6976729255 |
| H  | -3.2145616372 | -0.3685009086 | -3.0325921746 |
| C  | -4.7093647226 | 1.1520873508  | -3.4291493767 |
| H  | -5.0401651586 | 0.7111328424  | -4.3648899886 |
| C  | -5.3142705331 | 2.3430318856  | -2.9776301997 |
| H  | -6.0998645408 | 2.7983696480  | -3.5743019675 |
| C  | -4.9302216588 | 2.9562297690  | -1.7890017645 |
| H  | -5.4089396994 | 3.8743859366  | -1.4670802812 |
| C  | -3.9095587958 | 2.3415947528  | -1.0498107218 |
| C  | -3.5188333507 | 3.8110679382  | 1.0095671002  |
| H  | -2.8351762115 | 3.6898718702  | 1.8524337668  |
| C  | -4.9459186166 | 3.8048458441  | 1.5755930181  |
| H  | -5.1496280749 | 2.8645393722  | 2.0958849238  |
| H  | -5.6972407171 | 3.9275956033  | 0.7913682495  |
| H  | -5.0664087656 | 4.6268293468  | 2.2888351533  |



|    |               |               |               |
|----|---------------|---------------|---------------|
| C  | -3.1581843291 | 5.1255368482  | 0.3022030632  |
| H  | -2.1227148372 | 5.1012975750  | -0.0483296423 |
| H  | -3.2688271362 | 5.9672361743  | 0.9938394083  |
| H  | -3.8031648414 | 5.3105320560  | -0.5607898593 |
| Si | 1.8535431291  | 0.0700973164  | 1.7371057533  |
| N  | 1.8111916832  | 1.6316817442  | -0.6073603085 |
| N  | 3.9290514601  | 1.5083902362  | 0.1448361216  |
| C  | 2.7639226356  | -1.5911955394 | 1.6342288506  |
| H  | 2.3533083141  | -2.3303645321 | 2.3287128117  |
| H  | 3.8239075188  | -1.4728506135 | 1.8848270247  |
| H  | 2.6812377516  | -2.0038080521 | 0.6269906115  |
| C  | 2.2023650473  | 0.7605764242  | 3.4758719919  |
| H  | 3.2736332493  | 0.7694984264  | 3.7052008193  |
| H  | 1.7223503195  | 0.1152559708  | 4.2214848797  |
| H  | 1.8246758732  | 1.7753133559  | 3.6277731508  |
| C  | 2.5899149821  | 1.1759741853  | 0.3595564690  |
| C  | 2.6408634979  | 2.2805689389  | -1.4983007423 |
| C  | 2.3198986300  | 2.9305287285  | -2.6976729255 |
| H  | 1.2881496704  | 2.9681424941  | -3.0325921746 |
| C  | 3.3524192745  | 3.5023858101  | -3.4291493767 |
| H  | 3.1359416863  | 4.0093446454  | -4.3648899886 |
| C  | 4.6862604013  | 3.4307773414  | -2.9776301997 |
| H  | 5.4733914748  | 3.8834528280  | -3.5743019675 |
| C  | 5.0252809088  | 2.7915823183  | -1.7890017645 |
| H  | 6.0597864949  | 2.7470862189  | -1.4670802812 |
| C  | 3.9826599391  | 2.2149798584  | -1.0498107218 |
| C  | 5.0598983253  | 1.1418651043  | 1.0095671002  |
| H  | 4.6131108821  | 0.6103986883  | 1.8524337668  |

|   |              |               |               |
|---|--------------|---------------|---------------|
| C | 5.7680524667 | 2.3808682450  | 1.5755930181  |
| H | 5.0555779039 | 3.0274390468  | 2.0958849238  |
| H | 6.2500179268 | 2.9701573908  | 0.7913682495  |
| H | 6.5401561361 | 2.0742240236  | 2.2888351533  |
| C | 6.0179372831 | 0.1722994347  | 0.3022030632  |
| H | 5.4792107108 | -0.7123238135 | -0.0483296423 |
| H | 6.8021916854 | -0.1527307466 | 0.9938394083  |
| H | 6.5006380888 | 0.6383713394  | -0.5607898593 |

---

[Tism<sup>Pr<sup>i</sup>Benz\*</sup>]H (3:0 conformation)

---

| atom | x            | y             | z             |
|------|--------------|---------------|---------------|
| H    | 0.0255221527 | 0.0034818278  | 0.4584100931  |
| Si   | 1.7823279202 | -0.5176962074 | 1.9571819968  |
| N    | 2.8507180931 | 0.2015473233  | 0.6815601233  |
| N    | 3.3663035807 | 1.0875544568  | -1.2417364468 |
| C    | 0.0169639567 | 0.0162463811  | 1.5483017465  |
| C    | 2.3597214681 | 0.0880815000  | 3.6564319914  |
| H    | 2.3300187000 | 1.1762191085  | 3.7593584825  |
| H    | 3.3840177959 | -0.2344298769 | 3.8705735402  |
| H    | 1.7167715403 | -0.3389212595 | 4.4356029743  |
| C    | 2.1315468620 | -2.3698470969 | 1.8632287072  |
| H    | 1.7499510534 | -2.7606929859 | 0.9170943829  |
| H    | 1.6741564914 | -2.9338970669 | 2.6813120017  |
| H    | 3.2107985296 | -2.5496146522 | 1.9029976812  |
| C    | 2.3120756544 | 0.8668950856  | -0.4011398267 |
| C    | 4.2344084033 | 0.0082908448  | 0.5100100691  |
| C    | 5.2122847761 | -0.5906736939 | 1.3081818227  |

|    |               |               |               |
|----|---------------|---------------|---------------|
| H  | 4.9701122976  | -1.0185198739 | 2.2746601198  |
| C  | 6.5220738997  | -0.6219740555 | 0.8297144396  |
| H  | 7.2990501027  | -1.0846119796 | 1.4309301130  |
| C  | 6.8493583296  | -0.0643697112 | -0.4147093699 |
| H  | 7.8765521101  | -0.1037212026 | -0.7654102615 |
| C  | 5.8796749826  | 0.5435668137  | -1.2119415554 |
| H  | 6.1475993967  | 0.9730139964  | -2.1703176685 |
| C  | 4.5670316200  | 0.5756376018  | -0.7337136087 |
| C  | 3.1566384646  | 1.7684009014  | -2.5291446155 |
| H  | 2.0879259171  | 1.9978367657  | -2.5095288379 |
| C  | 3.9354511983  | 3.0872549316  | -2.6140456640 |
| H  | 3.6962877940  | 3.7289913892  | -1.7610097929 |
| H  | 3.6645122059  | 3.6208755301  | -3.5309312763 |
| H  | 5.0179995786  | 2.9294249900  | -2.6281285886 |
| C  | 3.4267976751  | 0.8317703918  | -3.7141999762 |
| H  | 2.8278044165  | -0.0789648260 | -3.6220212912 |
| H  | 4.4799596614  | 0.5422671885  | -3.7808103170 |
| H  | 3.1565770996  | 1.3280851208  | -4.6521637016 |
| Si | -0.4099440638 | 1.8173643012  | 1.9187110109  |
| N  | -1.5994634290 | 2.3284931905  | 0.6494973795  |
| N  | -2.6889800433 | 2.2468406482  | -1.2362650638 |
| C  | -1.1876559524 | 2.0588996048  | 3.6289308693  |
| H  | -2.0970330231 | 1.4711369307  | 3.7798466434  |
| H  | -1.4414406889 | 3.1088544524  | 3.8085331023  |
| H  | -0.4673813940 | 1.7642201808  | 4.4017328476  |
| C  | 1.0066165713  | 3.0531268947  | 1.7639762788  |
| H  | 1.5082449830  | 2.9074212445  | 0.8045038353  |
| H  | 1.7496994056  | 2.9474429231  | 2.5601183677  |

|    |               |               |               |
|----|---------------|---------------|---------------|
| H  | 0.6204425349  | 4.0769550459  | 1.8065493574  |
| C  | -1.9245558148 | 1.4880868137  | -0.3961578777 |
| C  | -2.1588662727 | 3.6048259780  | 0.4547588957  |
| C  | -2.1269762827 | 4.7774318225  | 1.2130967268  |
| H  | -1.6006417838 | 4.8261239422  | 2.1599344816  |
| C  | -2.7988531312 | 5.8951854930  | 0.7195839890  |
| H  | -2.7866063835 | 6.8190518320  | 1.2905222185  |
| C  | -3.4891777957 | 5.8453177857  | -0.4996402460 |
| H  | -4.0021640443 | 6.7319364036  | -0.8606770959 |
| C  | -3.5310758241 | 4.6757659332  | -1.2577657668 |
| H  | -4.0701333546 | 4.6500058213  | -2.1975971537 |
| C  | -2.8589141977 | 3.5544020886  | -0.7645385459 |
| C  | -3.2162708257 | 1.6721533847  | -2.4836547169 |
| H  | -2.8541756673 | 0.6412446193  | -2.4471699135 |
| C  | -4.7502818547 | 1.6485105452  | -2.4976470085 |
| H  | -5.1335096417 | 1.1347013587  | -1.6111530725 |
| H  | -5.1068400363 | 1.1140843457  | -3.3842150047 |
| H  | -5.1800133183 | 2.6544307849  | -2.5194467882 |
| C  | -2.6122272414 | 2.3526153111  | -3.7192032155 |
| H  | -1.5197604244 | 2.3185611543  | -3.6751947011 |
| H  | -2.9174684234 | 3.3998314958  | -3.8052891212 |
| H  | -2.9367219140 | 1.8342935973  | -4.6275562514 |
| Si | -1.3302156501 | -1.2509305467 | 1.9376262195  |
| N  | -1.2188636249 | -2.5111955518 | 0.6386326397  |
| N  | -0.6629226983 | -3.3593020105 | -1.2906020973 |
| C  | -1.1145126467 | -2.0748184897 | 3.6302038028  |
| H  | -0.1546177629 | -2.5823748600 | 3.7532353549  |
| H  | -1.9027589170 | -2.8126137422 | 3.8140692038  |

|   |               |               |               |
|---|---------------|---------------|---------------|
| H | -1.1945345228 | -1.3153033164 | 4.4175712725  |
| C | -3.1134405672 | -0.6378701935 | 1.8607642198  |
| H | -3.2883287392 | -0.1417934623 | 0.9039412779  |
| H | -3.3508126097 | 0.0671187300  | 2.6631034480  |
| H | -3.8057284466 | -1.4814522808 | 1.9500441819  |
| C | -0.3425146191 | -2.3593466588 | -0.4173555786 |
| C | -2.0784432769 | -3.6030420206 | 0.4184429326  |
| C | -3.1071796745 | -4.1650737795 | 1.1778127568  |
| H | -3.3780206494 | -3.7654104952 | 2.1487947533  |
| C | -3.7808317796 | -5.2679003813 | 0.6540550236  |
| H | -4.5860087121 | -5.7208198348 | 1.2251369531  |
| C | -3.4350446059 | -5.8010606055 | -0.5956310776 |
| H | -3.9787358588 | -6.6589444325 | -0.9802681188 |
| C | -2.4020418971 | -5.2513521715 | -1.3538818159 |
| H | -2.1420824548 | -5.6753478975 | -2.3167400740 |
| C | -1.7248205357 | -4.1472202957 | -0.8298250258 |
| C | 0.0603116446  | -3.4913206147 | -2.5647352343 |
| H | 0.7979896600  | -2.6864074480 | -2.5084891707 |
| C | 0.8054515718  | -4.8284704272 | -2.6645928977 |
| H | 1.4619239179  | -4.9663720479 | -1.8004509678 |
| H | 1.4218295848  | -4.8444298654 | -3.5693514379 |
| H | 0.1220602170  | -5.6815386573 | -2.7120187995 |
| C | -0.8582572717 | -3.2213453358 | -3.7640127834 |
| H | -1.3413858914 | -2.2455059468 | -3.6591053476 |
| H | -1.6403245175 | -3.9800355951 | -3.8645797472 |
| H | -0.2739980692 | -3.2185907488 | -4.6901081988 |

---

## REFERENCES

- (1) (a) McNally, J. P.; Leong, V. S.; Cooper, N. J. in *Experimental Organometallic Chemistry*, Wayda, A. L.; Darensbourg, M. Y., Eds.; American Chemical Society: Washington, DC, 1987; Chapter 2, pp 6-23.
- (b) Burger, B.J.; Bercaw, J. E. in *Experimental Organometallic Chemistry*; Wayda, A. L.; Darensbourg, M. Y., Eds.; American Chemical Society: Washington, DC, 1987; Chapter 4, pp 79-98.
- (c) Shriver, D. F.; Drezdson, M. A.; *The Manipulation of Air-Sensitive Compounds*, 2<sup>nd</sup> Edition; Wiley-Interscience: New York, 1986.
- (2) (a) Gottlieb, H. E.; Kotlyar, V.; Nudelman, A. J. *Org. Chem.* **1997**, *62*, 7512-7515.
- (b) Fulmer, G. R.; Miller, A. J. M.; Sherden, N. H.; Gottlieb, H. E.; Nudelman, A.; Stoltz, B. M.; Bercaw, J. E.; Goldberg, K. I. *Organometallics* **2010**, *29*, 2176-2179.
- (3) (a) Harris, R. K.; Becker, E. D.; De Menezes, S. M. C.; Goodfellow, R.; Granger, P. *Pure Appl. Chem.* **2001**, *73*, 1795-1818.
- (b) Harris, R. K.; Becker, E. D.; De Menezes, S. M. C.; Granger, P.; Hoffman, R. E.; Zilm, K. W. *Pure Appl. Chem.* **2008**, *80*, 59-84.
- (4) Starikova, O. V.; Dolgushin, G. V.; Larina, L. I.; Ushakov, P. E.; Komarova, T. N.; Lopyrev, V. A. *Russ. J. Org. Chem.* **2003**, *39*, 1467-1470.
- (5) (a) Qi, G.; Nitto, Y.; Saiki, A.; Tomohiro, T.; Nakayama, Y.; Yasuda, H. *Tetrahedron* **2003**, *59*, 10409-10418.
- (b) Sakurai, H.; Tominaga, K.; Watanabe, T.; Kumada, M. *Tetrahedron Lett.* **1966**, 5493-5497.
- (6) Yousef, R. I.; Walfort, B.; Ruffer, T.; Wagner, C.; Schmidt, H.; Herzog, R.; Steinborn, D. *J. Organomet. Chem.* **2005**, *690*, 1178-1191.
- (7) Schmidbaur, H.; Adlkofer, J.; Schwirten, K. *Chem. Ber.* **1972**, *105*, 3382-3388.
- (8) (a) Sheldrick, G. M. SHELXTL, An Integrated System for Solving, Refining, and Displaying Crystal Structures from Diffraction Data; University of Göttingen,

- Göttingen, Federal Republic of Germany, 1981.
- (b) Sheldrick, G. M. *Acta Cryst.* **2008**, A64, 112-122.
  - (c) Sheldrick, G. M. *Acta Cryst.* **2015**, A71, 3-8.
- (9) Jaguar 7.7, Schrödinger, LLC, New York, NY 2010.
- (10) (a) Becke, A. D. *J. Chem. Phys.* **1993**, 98, 5648-5652.
- (b) Becke, A. D. *Phys. Rev. A* **1988**, 38, 3098-3100.
  - (c) Lee, C. T.; Yang, W. T.; Parr, R. G. *Phys. Rev. B* **1988**, 37, 785-789.
  - (d) Vosko, S. H.; Wilk, L.; Nusair, M. *Can. J. Phys.* **1980**, 58, 1200-1211.
  - (e) Slater, J. C. *Quantum Theory of Molecules and Solids, Vol. 4: The Self-Consistent Field for Molecules and Solids*; McGraw-Hill: New York, 1974.
- (11) (a) Hay, P. J.; Wadt, W. R. *J. Chem. Phys.* **1985**, 82, 270-283.
- (b) Wadt, W. R.; Hay, P. J. *J. Chem. Phys.* **1985**, 82, 284-298.
  - (c) Hay, P. J.; Wadt, W. R. *J. Chem. Phys.* **1985**, 82, 299-310.
